# Supplementary material for: Specifically Increased Rate of Infections in Children Post Measles in a High Resource Setting
Source: Frontiers journal article supplement (doi:10.3389/fped.2022.896086), 2022-06-09
Supplement: Data_Sheet_1.pdf [file Data_Sheet_1.pdf]

## **Supplementary Material “Specifically increased rate of infections in children post measles in a high resource setting”**

### **Table of Contents**

|                                                                                               |           |
|-----------------------------------------------------------------------------------------------|-----------|
| <b>eTable 1. categorization of ICD-Codes.....</b>                                             | <b>2</b>  |
| <b>eTable 2. Changes in matching controls to cases.....</b>                                   | <b>17</b> |
| <b>eTable 3. repeat visits due to infectious diseases .....</b>                               | <b>22</b> |
| <b>eFigure 1. Distribution of studied measles cases over Berlin.....</b>                      | <b>27</b> |
| <b>eFigure 2. Empirical cumulative distribution of age.....</b>                               | <b>28</b> |
| <b>eFigure 3. Registered inhabitants per district .....</b>                                   | <b>29</b> |
| <b>eFigure 4. Number of infectious repeated visits per patient in percent per group .....</b> | <b>30</b> |

**eTable 1. categorization of ICD-Codes**

| ICD-Code | Description                                                                        | category | approximate duration of infection (days) | cluster |
|----------|------------------------------------------------------------------------------------|----------|------------------------------------------|---------|
| A00      | Cholera                                                                            | 1        | n/a*                                     | 12      |
| A01.4    | Paratyphoid fever, unspecified                                                     | 1        | n/a*                                     | 12      |
| A02.0    | Salmonella enteritis                                                               | 1        | 7                                        | 1       |
| A04.5    | Campylobacter enteritis                                                            | 1        | 7                                        | 1       |
| A04.7    | Enterocolitis due to Clostridium difficile                                         | 1        | 7                                        | 1       |
| A08.0    | Rotaviral enteritis                                                                | 1        | 7                                        | 1       |
| A08.1    | Acute gastroenteropathy due to Norwalk agent                                       | 1        | 7                                        | 1       |
| A08.2    | Adenoviral enteritis                                                               | 1        | 7                                        | 1       |
| A08.3    | Other viral enteritis                                                              | 1        | 7                                        | 1       |
| A08.4    | Viral intestinal infection, unspecified                                            | 1        | 7                                        | 1       |
| A09.0    | Infectious gastroenteritis and colitis, unspecified                                | 1        | 7                                        | 1       |
| A09.9    | Other gastroenteritis and colitis, unspecified                                     | 1        | 7                                        | 1       |
| A37.0    | Whooping cough due to Bordetella pertussis                                         | 1        | 21                                       | 6       |
| A38      | Scarlet fever                                                                      | 1        | 14                                       | 12      |
| A41.52   | Sepsis due to Pseudomonas                                                          | 1        | 28                                       | 12      |
| A46      | Erysipelas                                                                         | 1        | 14                                       | 8       |
| A49.0    | Methicillin susceptible Staphylococcus aureus infection, unspecified site          | 1        | 14                                       | 5       |
| A54.9    | Gonococcal infection, unspecified                                                  | 1        | 5                                        | 10      |
| A60.0    | Herpesviral infection of genital organs and urogenital system                      | 1        | 14                                       | 2       |
| A87.0    | Enteroviral meningitis                                                             | 1        | 7                                        | 12      |
| A88.8    | Other specified viral infections of central nervous system                         | 1        | 14                                       | 12      |
| B00.0    | Eczema herpeticum                                                                  | 1        | 14                                       | 2       |
| B00.2    | Herpesviral gingivostomatitis and pharyngotonsillitis                              | 1        | 14                                       | 2       |
| B00.9    | Herpesviral infection, unspecified                                                 | 1        | 14                                       | 2       |
| B01      | Varicella                                                                          | 1        | 14                                       | 2       |
| B02.2    | Other postherpetic nervous system involvement                                      | 1        | 14                                       | 2       |
| B05.1    | Measles complicated by meningitis                                                  | 1        | 21                                       | 13      |
| B05.2    | Measles complicated by pneumonia                                                   | 1        | 21                                       | 13      |
| B05.3    | Measles complicated by otitis media                                                | 1        | 21                                       | 13      |
| B05.4    | Measles with intestinal complications                                              | 1        | 21                                       | 13      |
| B05.8    | Other measles complications                                                        | 1        | 21                                       | 13      |
| B05.9    | Measles without complication                                                       | 1        | 21                                       | 13      |
| B08.2    | Exanthema subitum [sixth disease], unspecified                                     | 1        | 5                                        | 2       |
| B08.3    | Erythema infectiosum [fifth disease]                                               | 1        | 14                                       | 11      |
| B08.4    | Enteroviral vesicular stomatitis with exanthem                                     | 1        | 7                                        | 7       |
| B08.5    | Enteroviral vesicular pharyngitis                                                  | 1        | 7                                        | 5       |
| B08.8    | Other specified viral infections characterized by skin and mucous membrane lesions | 1        | 7                                        | 11      |
| B09      | Unspecified viral infection characterized by skin and mucous membrane lesions      | 1        | 7                                        | 11      |
| B27.0    | Gammaherpesviral mononucleosis without complication                                | 1        | 14                                       | 2       |

| ICD-Code | Description                                                  | category | approximate duration of infection (days) | cluster |
|----------|--------------------------------------------------------------|----------|------------------------------------------|---------|
| B34.0    | Adenovirus infection, unspecified                            | 1        | 7                                        | 11      |
| B34.1    | Enterovirus infection, unspecified                           | 1        | 7                                        | 11      |
| B34.8    | Other viral infections of unspecified site                   | 1        | 7                                        | 11      |
| B34.9    | Viral infection, unspecified                                 | 1        | 7                                        | 11      |
| B37      | Candidal stomatitis                                          | 1        | 14                                       | 8       |
| B37.2    | Candidiasis of skin and nail                                 | 1        | 14                                       | 8       |
| B38      | Coccidioidomycosis                                           | 1        | n/a*                                     | 12      |
| B80      | Enterobiasis                                                 | 1        | 3                                        | 1       |
| B85.0    | Pediculosis due to Pediculus humanus capitis                 | 1        | 3                                        | 12      |
| B86      | Scabies                                                      | 1        | n/a*                                     | 12      |
| B99      | Other and unspecified infectious disease                     | 1        | 7                                        | 11      |
| C83.5    | Lymphoblastic (diffuse) lymphoma                             | 2        | n/a                                      | 14      |
| C91.0    | Acute lymphoblastic leukemia                                 | 2        | n/a                                      | 14      |
| D16.9    | Benign neoplasm of bone and articular cartilage, unspecified | 2        | n/a                                      | 14      |
| D18.18   | Lymphangioma, any site                                       | 2        | n/a                                      | 14      |
| D48.5    | Neoplasm of uncertain behavior of skin                       | 2        | n/a                                      | 14      |
| D69.0    | Allergic purpura                                             | 2        | n/a                                      | 14      |
| D69.3    | Immune thrombocytopenic purpura                              | 2        | n/a                                      | 14      |
| D84.1    | Defects in the complement system                             | 2        | n/a                                      | 14      |
| E16.2    | Hypoglycemia, unspecified                                    | 2        | n/a                                      | 14      |
| F41.0    | Panic disorder [episodic paroxysmal anxiety]                 | 2        | n/a                                      | 14      |
| F45.33   | Somatoform disorder                                          | 2        | n/a                                      | 14      |
| F82.9    | Specific developmental disorder of motor function            | 2        | n/a                                      | 14      |
| G00.1    | Pneumococcal meningitis                                      | 1        | 14                                       | 12      |
| G40.3    | Generalized idiopathic epilepsy and epileptic syndromes      | 2        | n/a                                      | 14      |
| G41.0    | Grand-Mal-Status                                             | 2        | n/a                                      | 14      |
| G43.0    | Migraine without aura                                        | 2        | n/a                                      | 14      |
| G43.3    | Complicated migraine                                         | 2        | n/a                                      | 14      |
| G43.8    | Other migraine                                               | 2        | n/a                                      | 14      |
| G57.3    | Lesion of lateral popliteal nerve                            | 2        | n/a                                      | 14      |
| G58.0    | Intercostal neuropathy                                       | 2        | n/a                                      | 14      |
| H00.0    | Hordeolum                                                    | 1        | 14                                       | 3       |
| H02.8    | Other specified disorders of eyelid                          | 2        | n/a                                      | 14      |
| H05.0    | Acute inflammation of orbit                                  | 1        | 21                                       | 3       |
| H05.9    | Unspecified disorder of orbit                                | 2        | n/a                                      | 14      |
| H10      | Conjunctivitis                                               | 1        | 5                                        | 3       |
| H10.0    | Mucopurulent conjunctivitis                                  | 1        | 5                                        | 3       |
| H10.2    | other acute conjunctivitis                                   | 1        | 5                                        | 3       |
| H10.3    | Unspecified acute conjunctivitis                             | 1        | 5                                        | 3       |
| H10.8    | Other conjunctivitis                                         | 1        | 5                                        | 3       |
| H10.9    | Unspecified conjunctivitis                                   | 1        | 5                                        | 3       |

| ICD-Code | Description                                                             | category | approximate duration of infection (days) | cluster |
|----------|-------------------------------------------------------------------------|----------|------------------------------------------|---------|
| H11.3    | Conjunctival hemorrhage                                                 | 2        | n/a                                      | 14      |
| H11.9    | Unspecified disorder of conjunctiva                                     | 2        | n/a                                      | 14      |
| H16.0    | Corneal ulcer                                                           | 1        | 14                                       | 3       |
| H35.1    | Retinopathy of prematurity                                              | 2        | n/a                                      | 14      |
| H50.0    | Unspecified esotropia                                                   | 2        | n/a                                      | 14      |
| H57.8    | Other specified disorders of eye and adnexa                             | 2        | n/a                                      | 14      |
| H60.1    | Cellulitis of external ear                                              | 1        | 14                                       | 4       |
| H60.3    | Other infective otitis externa                                          | 1        | 7                                        | 4       |
| H60.9    | Unspecified otitis externa                                              | 1        | 7                                        | 4       |
| H65      | Acute nonsuppurative otitis media                                       | 1        | 3                                        | 4       |
| H65.0    | Acute serous otitis media                                               | 1        | 3                                        | 4       |
| H65.1    | Other acute nonsuppurative otitis media                                 | 1        | 3                                        | 4       |
| H65.2    | Chronic serous otitis media                                             | 1        | 3                                        | 4       |
| H65.4    | Other chronic nonsuppurative otitis media                               | 1        | 3                                        | 4       |
| H65.9    | Unspecified nonsuppurative otitis media                                 | 1        | 3                                        | 4       |
| H66.0    | Acute suppurative otitis media                                          | 1        | 7                                        | 4       |
| H66.4    | Suppurative otitis media, unspecified                                   | 1        | 7                                        | 4       |
| H66.9    | Otitis media, unspecified                                               | 1        | 7                                        | 4       |
| H67.1    | Otitis media in diseases classified elsewhere                           | 1        | 7                                        | 4       |
| H70.0    | Acute mastoiditis                                                       | 1        | 14                                       | 4       |
| H73.9    | Unspecified disorder of tympanic membrane                               | 2        | n/a                                      | 14      |
| H91.2    | Sudden idiopathic hearing loss                                          | 2        | n/a                                      | 14      |
| H92.0    | Otalgia                                                                 | 2        | n/a                                      | 14      |
| H93.2    | Other abnormal auditory perceptions                                     | 2        | n/a                                      | 14      |
| I46.0    | Cardiac arrest with successful resuscitation                            | 2        | n/a                                      | 14      |
| I47.1    | Supraventricular tachycardia                                            | 2        | n/a                                      | 14      |
| I80.28   | Phlebitis and thrombophlebitis of other deep vessels of lower extremity | 2        | n/a                                      | 14      |
| I88.0    | Nonspecific mesenteric lymphadenitis                                    | 2        | n/a                                      | 14      |
| I88.1    | Chronic lymphadenitis, except mesenteric                                | 2        | n/a                                      | 14      |
| I88.8    | Other nonspecific lymphadenitis                                         | 2        | n/a                                      | 14      |
| I88.9    | Nonspecific lymphadenitis, unspecified                                  | 2        | n/a                                      | 14      |
| I89.09   | Lymphedema, not elsewhere classified                                    | 2        | n/a                                      | 14      |
| I99      | Other and unspecified disorder of circulatory system                    | 2        | n/a                                      | 14      |
| J00      | Acute nasopharyngitis [common cold]                                     | 1        | 10                                       | 11      |
| J02      | Acute pharyngitis                                                       | 1        | 4                                        | 5       |
| J02.0    | Streptococcal pharyngitis                                               | 1        | 14                                       | 5       |
| J02.8    | Acute pharyngitis due to other specified organisms                      | 1        | 4                                        | 5       |
| J02.9    | Acute pharyngitis, unspecified                                          | 1        | 4                                        | 5       |
| J03      | Acute tonsillitis                                                       | 1        | 14                                       | 5       |
| J03.0    | Acute streptococcal tonsillitis, unspecified                            | 1        | 14                                       | 5       |
| J03.8    | Acute tonsillitis due to other specified organisms                      | 1        | 14                                       | 5       |

| ICD-Code | Description                                                                         | category | approximate duration of infection (days) | cluster |
|----------|-------------------------------------------------------------------------------------|----------|------------------------------------------|---------|
| J03.9    | Acute tonsillitis, unspecified                                                      | 1        | 14                                       | 5       |
| J04.0    | Acute laryngitis                                                                    | 1        | 4                                        | 5       |
| J04.2    | Acute laryngotracheitis                                                             | 1        | 4                                        | 5       |
| J05.0    | Acute obstructive laryngitis [croup]                                                | 1        | 2                                        | 5       |
| J06.0    | Acute laryngopharyngitis                                                            | 1        | 2                                        | 5       |
| J06.8    | Acute upper respiratory infections of multiple and unspecified sites                | 1        | 10                                       | 11      |
| J06.9    | Acute upper respiratory infection, unspecified                                      | 1        | 10                                       | 11      |
| J09      | Influenza due to certain identified influenza viruses                               | 1        | 10                                       | 5       |
| J10.0    | Influenza due to seasonal influenza virus with pneumonia                            | 1        | 10                                       | 6       |
| J11.1    | Influenza due to unidentified influenza virus with other respiratory manifestations | 1        | 10                                       | 5       |
| J12.1    | Respiratory syncytial virus pneumonia                                               | 1        | 14                                       | 6       |
| J12.8    | Other viral pneumonia                                                               | 1        | 14                                       | 6       |
| J13      | Pneumonia due to Streptococcus pneumoniae                                           | 1        | 14                                       | 6       |
| J15.7    | Pneumonia due to Mycoplasma pneumoniae                                              | 1        | 14                                       | 6       |
| J15.8    | Pneumonia due to other specified bacteria                                           | 1        | 14                                       | 6       |
| J15.9    | Unspecified bacterial pneumonia                                                     | 1        | 14                                       | 6       |
| J17.1    | Pneumonia in diseases classified elsewhere                                          | 1        | 14                                       | 6       |
| J18.0    | Bronchopneumonia, unspecified organism                                              | 1        | 14                                       | 6       |
| J18.1    | Lobar pneumonia, unspecified organism                                               | 1        | 14                                       | 6       |
| J18.8    | Other pneumonia, unspecified organism                                               | 1        | 14                                       | 6       |
| J18.9    | Pneumonia, unspecified organism                                                     | 1        | 14                                       | 6       |
| J20      | Acute bronchitis                                                                    | 1        | 7                                        | 6       |
| J20.5    | Acute bronchitis due to respiratory syncytial virus                                 | 1        | 7                                        | 6       |
| J20.8    | Acute bronchitis due to other specified organisms                                   | 1        | 7                                        | 6       |
| J20.9    | Acute bronchitis, unspecified                                                       | 1        | 7                                        | 6       |
| J21.0    | Acute bronchiolitis due to respiratory syncytial virus                              | 1        | 21                                       | 6       |
| J22      | Unspecified acute lower respiratory infection                                       | 1        | 14                                       | 6       |
| J35.0    | Chronic tonsillitis                                                                 | 1        | 14                                       | 5       |
| J35.1    | Hypertrophy of tonsils                                                              | 2        | n/a                                      | 14      |
| J35.2    | Hypertrophy of adenoids                                                             | 2        | n/a                                      | 14      |
| J35.3    | Hypertrophy of tonsils with hypertrophy of adenoids                                 | 2        | n/a                                      | 14      |
| J35.8    | Other chronic diseases of tonsils and adenoids                                      | 2        | n/a                                      | 14      |
| J38.5    | Laryngeal spasm                                                                     | 1        | 2                                        | 5       |
| J40      | Bronchitis, not specified as acute or chronic                                       | 1        | 7                                        | 6       |
| J41.1    | Mucopurulent chronic bronchitis                                                     | 1        | 7                                        | 6       |
| J44.89   | Chronic obstructive pulmonary disease, unspecified                                  | 1        | 14                                       | 6       |
| J45.9    | Unspecified asthma                                                                  | 2        | n/a                                      | 14      |
| J98.8    | Other specified respiratory disorders                                               | 2        | n/a                                      | 14      |
| K00.7    | Teething syndrome                                                                   | 2        | n/a                                      | 14      |
| K01.0    | Embedded teeth                                                                      | 2        | n/a                                      | 14      |
| K02.9    | Dental caries, unspecified                                                          | 1        | n/a*                                     | 7       |

| ICD-Code | Description                                                                                | category | approximate duration of infection (days) | cluster |
|----------|--------------------------------------------------------------------------------------------|----------|------------------------------------------|---------|
| K04.7    | Periapical abscess without sinus                                                           | 1        | n/a*                                     | 7       |
| K05.0    | Acute gingivitis                                                                           | 1        | n/a*                                     | 7       |
| K08.1    | Complete loss of teeth due to trauma, extraction or localised periodontal diseases         | 2        | n/a                                      | 14      |
| K08.88   | Other specified disorders of teeth and supporting structures                               | 2        | n/a                                      | 14      |
| K08.9    | Disorder of teeth and supporting structures, unspecified                                   | 2        | n/a                                      | 14      |
| K11.2    | Sialoadenitis                                                                              | 1        | n/a*                                     | 7       |
| K12.0    | Recurrent oral aphthae                                                                     | 1        | 7                                        | 7       |
| K12.1    | Other forms of stomatitis                                                                  | 1        | 7                                        | 7       |
| K12.28   | Cellulitis and abscess of mouth                                                            | 1        | 14                                       | 7       |
| K20      | Esophagitis                                                                                | 1        | n/a*                                     | 1       |
| K21.0    | Gastro-esophageal reflux disease with esophagitis                                          | 2        | n/a                                      | 14      |
| K21.9    | Gastro-esophageal reflux disease without esophagitis                                       | 2        | n/a                                      | 14      |
| K29.1    | Other acute gastritis                                                                      | 1        | 7                                        | 1       |
| K29.5    | Unspecified chronic gastritis                                                              | 2        | n/a                                      | 14      |
| K29.7    | Gastritis, unspecified                                                                     | 1        | 7                                        | 1       |
| K35      | Acute appendicitis                                                                         | 1        | n/a*                                     | 12      |
| K35.2    | Acute appendicitis with generalized peritonitis                                            | 1        | n/a*                                     | 12      |
| K35.30   | Acute appendicitis with localized peritonitis, without perforation or gangrene             | 1        | n/a*                                     | 12      |
| K35.32   | Acute appendicitis with abscess                                                            | 1        | n/a*                                     | 12      |
| K35.8    | Unspecified acute appendicitis                                                             | 1        | n/a*                                     | 12      |
| K36      | Other appendicitis                                                                         | 1        | n/a*                                     | 12      |
| K37      | Unspecified appendicitis                                                                   | 1        | n/a*                                     | 12      |
| K40.20   | Bilateral inguinal hernia, without obstruction or gangrene, not specified as recurrent     | 2        | n/a                                      | 14      |
| K40.30   | Unilateral inguinal hernia, with obstruction, without gangrene, not specified as recurrent | 2        | n/a                                      | 14      |
| K40.31   | Unilateral inguinal hernia, with obstruction, without gangrene, recurrent                  | 2        | n/a                                      | 14      |
| K40.9    | Unilateral inguinal hernia, without obstruction or gangrene                                | 2        | n/a                                      | 14      |
| K40.90   | Unilateral inguinal hernia, without obstruction or gangrene, not specified as recurrent    | 2        | n/a                                      | 14      |
| K42.9    | Umbilical hernia without obstruction or gangrene                                           | 2        | n/a                                      | 14      |
| K44.9    | Diaphragmatic hernia without obstruction or gangrene                                       | 2        | n/a                                      | 14      |
| K52.1    | Toxic gastroenteritis and colitis                                                          | 2        | n/a                                      | 14      |
| K52.9    | Noninfective gastroenteritis and colitis, unspecified                                      | 2        | n/a                                      | 14      |
| K56.1    | Intussusception                                                                            | 2        | n/a                                      | 14      |
| K56.7    | Ileus, unspecified                                                                         | 2        | n/a                                      | 14      |
| K59.0    | Constipation                                                                               | 2        | n/a                                      | 14      |
| K59.9    | Functional intestinal disorder, unspecified                                                | 2        | n/a                                      | 14      |
| K60.2    | Anal fissure, unspecified                                                                  | 2        | n/a                                      | 14      |
| K61.0    | Anal abscess                                                                               | 2        | n/a                                      | 14      |
| K64.8    | Other hemorrhoids                                                                          | 2        | n/a                                      | 14      |
| K65.0    | Generalized (acute) peritonitis                                                            | 1        | n/a*                                     | 12      |
| K66.0    | Peritoneal adhesions (postprocedural) (postinfection)                                      | 2        | n/a                                      | 14      |

| ICD-Code | Description                                                             | category | approximate duration of infection (days) | cluster |
|----------|-------------------------------------------------------------------------|----------|------------------------------------------|---------|
| K83.1    | Obstruction of bile duct                                                | 2        | n/a                                      | 14      |
| K86.8    | Other specified diseases of pancreas                                    | 2        | n/a                                      | 14      |
| K92.1    | Melena                                                                  | 2        | n/a                                      | 14      |
| L01.0    | Impetigo, unspecified                                                   | 1        | 5                                        | 8       |
| L02.2    | Cutaneous abscess, furuncle and carbuncle of trunk                      | 1        | 5                                        | 8       |
| L02.4    | Cutaneous abscess, furuncle and carbuncle of limb                       | 1        | 5                                        | 8       |
| L02.8    | Cutaneous abscess, furuncle and carbuncle of other sites                | 1        | 5                                        | 8       |
| L03.01   | Cellulitis and acute lymphangitis of finger                             | 1        | 14                                       | 8       |
| L03.02   | Cellulitis and acute lymphangitis of toe                                | 1        | 14                                       | 8       |
| L03.10   | Cellulitis of upper limb                                                | 1        | 14                                       | 8       |
| L03.11   | Cellulitis of lower limb                                                | 1        | 14                                       | 8       |
| L03.2    | Cellulitis of face                                                      | 1        | 14                                       | 8       |
| L04.0    | Acute lymphadenitis of face, head and neck                              | 1        | 7                                        | 8       |
| L05.0    | Pilonidal cyst with abscess                                             | 1        | 14                                       | 8       |
| L08.9    | Local infection of the skin and subcutaneous tissue, unspecified        | 1        | 7                                        | 8       |
| L20.8    | Other seborrheic dermatitis                                             | 2        | n/a                                      | 14      |
| L20.9    | Seborrheic dermatitis, unspecified                                      | 2        | n/a                                      | 14      |
| L22      | Diaper dermatitis                                                       | 1        | 14                                       | 8       |
| L23.9    | Allergic contact dermatitis, unspecified cause                          | 2        | n/a                                      | 14      |
| L28.2    | Other prurigo                                                           | 2        | n/a                                      | 14      |
| L30.9    | Dermatitis, unspecified                                                 | 2        | n/a                                      | 14      |
| L44.4    | Infantile papular acrodermatitis [Gianotti-Crosti]                      | 2        | n/a                                      | 14      |
| L50.0    | Allergic urticaria                                                      | 2        | n/a                                      | 14      |
| L50.1    | Idiopathic urticaria                                                    | 2        | n/a                                      | 14      |
| L50.6    | Contact urticaria                                                       | 2        | n/a                                      | 14      |
| L50.8    | Other urticaria                                                         | 2        | n/a                                      | 14      |
| L50.9    | Urticaria, unspecified                                                  | 2        | n/a                                      | 14      |
| L51      | Nonbullous erythema multiforme                                          | 2        | n/a                                      | 14      |
| L51.9    | Erythema multiforme, unspecified                                        | 2        | n/a                                      | 14      |
| L53.8    | Other specified erythematous conditions                                 | 2        | n/a                                      | 14      |
| L56.2    | Photocontact dermatitis [berloque dermatitis]                           | 2        | n/a                                      | 14      |
| L73.9    | Follicular disorder, unspecified                                        | 2        | n/a                                      | 14      |
| L85.3    | Xerosis cutis                                                           | 2        | n/a                                      | 14      |
| M00.99   | Pyogenic arthritis, unspecified                                         | 1        | 14                                       | 9       |
| M02.96   | Reactive arthropathy, unspecified, lower limb                           | 2        | n/a                                      | 14      |
| M12.8    | Other specific arthropathies, not elsewhere classified                  | 2        | n/a                                      | 14      |
| M12.80   | Other specific arthropathies, not elsewhere classified, multiple sites  | 2        | n/a                                      | 14      |
| M12.85   | Other specific arthropathies, not elsewhere classified, unspecified hip | 2        | n/a                                      | 14      |
| M23.99   | Unspecified internal derangement of unspecified knee                    | 2        | n/a                                      | 14      |
| M25.46   | Effusion, lower limb                                                    | 2        | n/a                                      | 14      |
| M25.47   | Effusion, ankle and foot                                                | 2        | n/a                                      | 14      |

| ICD-Code | Description                                                  | category | approximate duration of infection (days) | cluster |
|----------|--------------------------------------------------------------|----------|------------------------------------------|---------|
| M25.51   | Pain in unspecified shoulder                                 | 2        | n/a                                      | 14      |
| M25.52   | Pain in unspecified elbow                                    | 2        | n/a                                      | 14      |
| M25.53   | Pain in unspecified wrist                                    | 2        | n/a                                      | 14      |
| M25.56   | Pain in unspecified knee                                     | 2        | n/a                                      | 14      |
| M25.75   | Osteophyte, unspecified hip                                  | 2        | n/a                                      | 14      |
| M41.15   | Juvenile idiopathic scoliosis, thoracolumbar region          | 2        | n/a                                      | 14      |
| M43.6    | Torticollis                                                  | 2        | n/a                                      | 14      |
| M54.2    | Cervicalgia                                                  | 2        | n/a                                      | 14      |
| M54.4    | Lumbago with sciatica, unspecified side                      | 2        | n/a                                      | 14      |
| M54.84   | Other dorsalgia, thoracic region                             | 2        | n/a                                      | 14      |
| M54.96   | Dorsalgia, unspecified, lumbar region                        | 2        | n/a                                      | 14      |
| M62.88   | Other specified disorders of muscle, other region            | 2        | n/a                                      | 14      |
| M62.89   | Other specified disorders of muscle, region not specified    | 2        | n/a                                      | 14      |
| M65.3    | Trigger finger                                               | 2        | n/a                                      | 14      |
| M77.5    | Other enthesopathy of unspecified foot and ankle             | 2        | n/a                                      | 14      |
| M79.58   | Residual foreign body in soft tissue, other region           | 2        | n/a                                      | 14      |
| M79.60   | Pain in multiple limbs                                       | 2        | n/a                                      | 14      |
| M79.64   | Pain in unspecified hand                                     | 2        | n/a                                      | 14      |
| M79.69   | Pain in unspecified limb                                     | 2        | n/a                                      | 14      |
| M86.07   | Acute hematogenous osteomyelitis, unspecified ankle and foot | 1        | 14                                       | 9       |
| N10      | Acute pyelonephritis                                         | 2        | n/a                                      | 14      |
| N28.8    | Other specified disorders of kidney and ureter               | 2        | n/a                                      | 14      |
| N30.0    | Acute cystitis                                               | 1        | 7                                        | 10      |
| N30.9    | Cystitis, unspecified                                        | 1        | 7                                        | 10      |
| N39.0    | Urinary tract infection, site not specified                  | 1        | 7                                        | 10      |
| N43.2    | Other hydrocele                                              | 2        | n/a                                      | 14      |
| N43.3    | Hydrocele, unspecified                                       | 2        | n/a                                      | 14      |
| N44.0    | Torsion of testis, unspecified                               | 2        | n/a                                      | 14      |
| N44.1    | Torsion of testis, unspecified                               | 2        | n/a                                      | 14      |
| N45.9    | Orchitis, epididymitis and epididymoorchitis without abscess | 1        | 14                                       | 10      |
| N47      | Redundant prepuce, phimosis and paraphimosis                 | 2        | n/a                                      | 14      |
| N48.1    | Balanitis                                                    | 1        | 5                                        | 10      |
| N48.8    | Other specified disorders of penis                           | 2        | n/a                                      | 14      |
| N50.8    | Other specified disorders of the male genital organs         | 2        | n/a                                      | 14      |
| N51.2    | Balanitis in diseases classified elsewhere                   | 1        | 5                                        | 10      |
| N61      | Inflammatory disorders of breast                             | 1        | n/a*                                     | 8       |
| N70.0    | Acute salpingitis and oophoritis                             | 1        | n/a*                                     | 10      |
| N70.9    | Salpingitis and oophoritis, unspecified                      | 1        | 14                                       | 10      |
| N76.0    | Acute vaginitis                                              | 1        | 14                                       | 10      |
| N76.2    | Acute vulvitis                                               | 1        | 5                                        | 10      |
| N76.88   | Other specified inflammation of vagina and vulva             | 1        | 5                                        | 10      |



| ICD-Code | Description                                                                     | category | approximate duration of infection (days) | cluster |
|----------|---------------------------------------------------------------------------------|----------|------------------------------------------|---------|
| N83.2    | Unspecified ovarian cyst, unspecified side                                      | 2        | n/a                                      | 14      |
| N92.1    | Excessive and frequent menstruation with irregular cycle                        | 2        | n/a                                      | 14      |
| N92.5    | Other specified irregular menstruation                                          | 2        | n/a                                      | 14      |
| N94.4    | Primary dysmenorrhea                                                            | 2        | n/a                                      | 14      |
| N94.9    | Unspecified condition associated with female genital organs and menstrual cycle | 2        | n/a                                      | 14      |
| O06.9    | Unspecified abortion                                                            | 2        | n/a                                      | 14      |
| O23.0    | Infections of kidney in pregnancy                                               | 1        | 5                                        | 10      |
| O41.0    | Oligohydramnios                                                                 | 2        | n/a                                      | 14      |
| O60.0    | Preterm labor without delivery                                                  | 2        | n/a                                      | 14      |
| O60.3    | Preterm delivery without spontaneous labour                                     | 2        | n/a                                      | 14      |
| O70.1    | Second degree perineal laceration during delivery                               | 2        | n/a                                      | 14      |
| P78.8    | Other specified perinatal digestive system disorders                            | 2        | n/a                                      | 14      |
| Q12.0    | Congenital cataract                                                             | 2        | n/a                                      | 14      |
| Q18.0    | Sinus, fistula and cyst of branchial cleft                                      | 2        | n/a                                      | 14      |
| Q53.1    | Unspecified undescended testicle, unilateral                                    | 2        | n/a                                      | 14      |
| Q53.2    | Undescended testicle, unspecified, bilateral                                    | 2        | n/a                                      | 14      |
| Q54.0    | Hypospadias, balanic                                                            | 2        | n/a                                      | 14      |
| Q55.2    | Unspecified congenital malformations of testis and scrotum                      | 2        | n/a                                      | 14      |
| Q66.0    | Congenital talipes equinovarus                                                  | 2        | n/a                                      | 14      |
| R00.0    | Tachycardia, unspecified                                                        | 2        | n/a                                      | 14      |
| R00.2    | Palpitations                                                                    | 2        | n/a                                      | 14      |
| R04.0    | Epistaxis                                                                       | 2        | n/a                                      | 14      |
| R05      | Cough                                                                           | 2        | n/a                                      | 14      |
| R06.0    | Dyspnea, unspecified                                                            | 2        | n/a                                      | 14      |
| R06.4    | Hyperventilation                                                                | 2        | n/a                                      | 14      |
| R07.0    | Pain in throat                                                                  | 2        | n/a                                      | 14      |
| R07.1    | Chest pain on breathing                                                         | 2        | n/a                                      | 14      |
| R07.3    | Other chest pain                                                                | 2        | n/a                                      | 14      |
| R07.4    | Chest pain, unspecified                                                         | 2        | n/a                                      | 14      |
| R10.0    | Acute abdomen                                                                   | 2        | n/a                                      | 14      |
| R10.1    | Upper abdominal pain, unspecified                                               | 2        | n/a                                      | 14      |
| R10.3    | Lower abdominal pain, unspecified                                               | 2        | n/a                                      | 14      |
| R10.4    | Unspecified abdominal pain                                                      | 2        | n/a                                      | 14      |
| R11      | Nausea and vomiting                                                             | 2        | n/a                                      | 14      |
| R13.9    | Other dysphagia                                                                 | 2        | n/a                                      | 14      |
| R14      | Abdominal distension (gaseous)                                                  | 2        | n/a                                      | 14      |
| R19.80   | Abdominal compartment syndrome                                                  | 2        | n/a                                      | 14      |
| R19.88   | Other specified symptoms and signs involving the digestive system and abdomen   | 2        | n/a                                      | 14      |
| R20.2    | Paresthesia of skin                                                             | 2        | n/a                                      | 14      |
| R20.3    | Hyperesthesia                                                                   | 2        | n/a                                      | 14      |
| R20.8    | Other disturbances of skin sensation                                            | 2        | n/a                                      | 14      |

| ICD-Code | Description                                                                                     | category | approximate duration of infection (days) | cluster |
|----------|-------------------------------------------------------------------------------------------------|----------|------------------------------------------|---------|
| R21      | Rash and other nonspecific skin eruption                                                        | 2        | n/a                                      | 14      |
| R22.0    | Localized swelling, mass and lump, head                                                         | 2        | n/a                                      | 14      |
| R23.0    | Cyanosis                                                                                        | 2        | n/a                                      | 14      |
| R23.3    | Spontaneous ecchymoses                                                                          | 2        | n/a                                      | 14      |
| R26.8    | Other abnormalities of gait and mobility                                                        | 2        | n/a                                      | 14      |
| R30.0    | Dysuria                                                                                         | 2        | n/a                                      | 14      |
| R40.0    | Somnolence                                                                                      | 2        | n/a                                      | 14      |
| R42      | Dizziness and giddiness                                                                         | 2        | n/a                                      | 14      |
| R45.1    | Restlessness and agitation                                                                      | 2        | n/a                                      | 14      |
| R50.80   | Fever of unknown origin                                                                         | 1        | 7                                        | 11      |
| R50.9    | Fever, unspecified                                                                              | 1        | 7                                        | 11      |
| R51      | Headache                                                                                        | 2        | n/a                                      | 14      |
| R52.9    | Pain, unspecified                                                                               | 2        | n/a                                      | 14      |
| R55      | Syncope and collapse                                                                            | 2        | n/a                                      | 14      |
| R56.0    | Febrile convulsions                                                                             | 1        | 4                                        | 11      |
| R56.8    | Unspecified convulsions                                                                         | 2        | n/a                                      | 14      |
| R59.0    | Localized enlarged lymph nodes                                                                  | 2        | n/a                                      | 14      |
| R62.8    | Other lack of expected normal physiological development in childhood                            | 2        | n/a                                      | 14      |
| R78.8    | Finding of other specified substances, not normally found in blood                              | 2        | n/a                                      | 14      |
| S00.05   | Superficial injury of scalp                                                                     | 2        | n/a                                      | 14      |
| S00.08   | Superficial injury of scalp, other                                                              | 2        | n/a                                      | 14      |
| S00.1    | Contusion of unspecified eyelid and periocular area                                             | 2        | n/a                                      | 14      |
| S00.23   | Other superficial injuries of eyelid and periocular area                                        | 2        | n/a                                      | 14      |
| S00.35   | Superficial injury of nose                                                                      | 2        | n/a                                      | 14      |
| S00.45   | Superficial injury of ear                                                                       | 2        | n/a                                      | 14      |
| S00.50   | Superficial injury of lip and oral cavity, unspecified                                          | 2        | n/a                                      | 14      |
| S00.58   | Superficial injury of lip and oral cavity, other                                                | 2        | n/a                                      | 14      |
| S00.81   | Abrasion of other part of head                                                                  | 2        | n/a                                      | 14      |
| S00.85   | Superficial injury of other parts of head                                                       | 2        | n/a                                      | 14      |
| S00.9    | Unspecified superficial injury of unspecified part of head                                      | 2        | n/a                                      | 14      |
| S00.95   | Unspecified superficial injury of unspecified part of head, bruise                              | 2        | n/a                                      | 14      |
| S00.98   | Unspecified superficial injury of unspecified part of head, other                               | 2        | n/a                                      | 14      |
| S01.0    | Unspecified open wound of scalp                                                                 | 2        | n/a                                      | 14      |
| S01.1    | Unspecified open wound of eyelid and periocular area                                            | 2        | n/a                                      | 14      |
| S01.20   | Unspecified open wound of eyelid and periocular area, initial encounter                         | 2        | n/a                                      | 14      |
| S01.21   | Laceration without foreign body of nose                                                         | 2        | n/a                                      | 14      |
| S01.30   | Unspecified open wound of ear                                                                   | 2        | n/a                                      | 14      |
| S01.31   | Laceration without foreign body of ear                                                          | 2        | n/a                                      | 14      |
| S01.41   | Laceration without foreign body of cheek and temporomandibular area                             | 2        | n/a                                      | 14      |
| S01.49   | Laceration without foreign body of cheek and temporomandibular area, other and multiple regions | 2        | n/a                                      | 14      |
| S01.51   | Unspecified open wound of lip                                                                   | 2        | n/a                                      | 14      |

| ICD-Code | Description                                                                 | category | approximate duration of infection (days) | cluster |
|----------|-----------------------------------------------------------------------------|----------|------------------------------------------|---------|
| S01.54   | Unspecified open wound of tongue                                            | 2        | n/a                                      | 14      |
| S01.55   | Unspecified open wound of oral cavity                                       | 2        | n/a                                      | 14      |
| S01.59   | Unspecified open wound of oral cavity, other and multiple regions           | 2        | n/a                                      | 14      |
| S01.80   | Unspecified open wound of other part of head                                | 2        | n/a                                      | 14      |
| S01.9    | Unspecified open wound of unspecified part of head                          | 2        | n/a                                      | 14      |
| S02.0    | Fracture of vault of skull                                                  | 2        | n/a                                      | 14      |
| S02.1    | Fracture of base of skull                                                   | 2        | n/a                                      | 14      |
| S02.2    | Fracture of nasal bones                                                     | 2        | n/a                                      | 14      |
| S02.8    | Fracture of other specified skull and facial bones                          | 2        | n/a                                      | 14      |
| S02.9    | Unspecified fracture of skull                                               | 2        | n/a                                      | 14      |
| S03.2    | Dislocation of tooth                                                        | 2        | n/a                                      | 14      |
| S05.0    | Injury of conjunctiva and corneal abrasion without foreign body             | 2        | n/a                                      | 14      |
| S05.1    | Contusion of eyeball and orbital tissues                                    | 2        | n/a                                      | 14      |
| S06.0    | Concussion without loss of consciousness                                    | 2        | n/a                                      | 14      |
| S06.9    | Unspecified intracranial injury without loss of consciousness               | 2        | n/a                                      | 14      |
| S09.9    | Unspecified injury of head                                                  | 2        | n/a                                      | 14      |
| S10.83   | Contusion of other specified part of neck                                   | 2        | n/a                                      | 14      |
| S10.85   | Superficial foreign body of other specified part of neck, initial encounter | 2        | n/a                                      | 14      |
| S13.4    | Sprain of ligaments of cervical spine                                       | 2        | n/a                                      | 14      |
| S13.6    | Sprain of joints and ligaments of other parts of neck                       | 2        | n/a                                      | 14      |
| S20.2    | Contusion of thorax                                                         | 2        | n/a                                      | 14      |
| S27.31   | Unspecified injury of lung                                                  | 2        | n/a                                      | 14      |
| S30.0    | Contusion of lower back and pelvis                                          | 2        | n/a                                      | 14      |
| S30.1    | Contusion of abdominal wall                                                 | 2        | n/a                                      | 14      |
| S30.2    | Contusion of unspecified external genital organ                             | 2        | n/a                                      | 14      |
| S30.81   | Abrasion of abdominal wall                                                  | 2        | n/a                                      | 14      |
| S30.95   | Unspecified superficial injury of lower back and pelvis                     | 2        | n/a                                      | 14      |
| S31.0    | Unspecified open wound of lower back and pelvis                             | 2        | n/a                                      | 14      |
| S39.9    | Unspecified injury of abdomen, lower back or pelvis                         | 2        | n/a                                      | 14      |
| S40.0    | Contusion of shoulder and upper arm                                         | 2        | n/a                                      | 14      |
| S41.0    | Unspecified open wound of shoulder                                          | 2        | n/a                                      | 14      |
| S41.1    | Unspecified open wound of upper arm                                         | 2        | n/a                                      | 14      |
| S42.00   | Fracture of unspecified part of clavicle                                    | 2        | n/a                                      | 14      |
| S42.01   | Fracture of sternal end of clavicle                                         | 2        | n/a                                      | 14      |
| S42.02   | Fracture of shaft of clavicle                                               | 2        | n/a                                      | 14      |
| S42.20   | Unspecified fracture of upper end of humerus                                | 2        | n/a                                      | 14      |
| S42.22   | Fracture of surgical neck of humerus                                        | 2        | n/a                                      | 14      |
| S42.23   | Fracture of anatomical neck of humerus                                      | 2        | n/a                                      | 14      |
| S42.3    | Fracture of shaft of humerus                                                | 2        | n/a                                      | 14      |
| S42.41   | Supracondylar fracture of humerus                                           | 2        | n/a                                      | 14      |
| S42.43   | Fracture of medial epicondyle of humerus                                    | 2        | n/a                                      | 14      |

| ICD-Code | Description                                                                       | category | approximate duration of infection (days) | cluster |
|----------|-----------------------------------------------------------------------------------|----------|------------------------------------------|---------|
| S42.45   | Transcondylar fracture of humerus                                                 | 2        | n/a                                      | 14      |
| S42.49   | Other fracture of lower end of humerus                                            | 2        | n/a                                      | 14      |
| S43.4    | Unspecified sprain of shoulder joint                                              | 2        | n/a                                      | 14      |
| S50.0    | Contusion of elbow                                                                | 2        | n/a                                      | 14      |
| S50.1    | Contusion of forearm, unspecified                                                 | 2        | n/a                                      | 14      |
| S51.9    | Unspecified open wound of forearm                                                 | 2        | n/a                                      | 14      |
| S52.0    | Fracture of upper end of ulna                                                     | 2        | n/a                                      | 14      |
| S52.00   | Fracture of upper end of ulna, unspecified                                        | 2        | n/a                                      | 14      |
| S52.11   | Fracture of head of radius                                                        | 2        | n/a                                      | 14      |
| S52.12   | Fracture of neck of radius                                                        | 2        | n/a                                      | 14      |
| S52.30   | Fracture of shaft of radius                                                       | 2        | n/a                                      | 14      |
| S52.4    | Fracture of shaft of ulna and radius, combined                                    | 2        | n/a                                      | 14      |
| S52.50   | Fracture of the lower end of radius, unspecified                                  | 2        | n/a                                      | 14      |
| S52.6    | Fracture of the lower end of ulna, unspecified                                    | 2        | n/a                                      | 14      |
| S52.8    | Unspecified other fracture of forearm                                             | 2        | n/a                                      | 14      |
| S53.0    | Subluxation of radial head                                                        | 2        | n/a                                      | 14      |
| S53.40   | Sprain of elbow, unspecified                                                      | 2        | n/a                                      | 14      |
| S53.48   | Other sprain of elbow                                                             | 2        | n/a                                      | 14      |
| S60.0    | Contusion of unspecified finger without damage to nail                            | 2        | n/a                                      | 14      |
| S60.2    | Contusion of unspecified wrist                                                    | 2        | n/a                                      | 14      |
| S60.81   | Abrasion of unspecified wrist                                                     | 2        | n/a                                      | 14      |
| S60.84   | Superficial foreign body of unspecified wrist                                     | 2        | n/a                                      | 14      |
| S61.0    | Open wound of finger without damage to nail                                       | 2        | n/a                                      | 14      |
| S61.1    | Open wound of finger with damage to nail                                          | 2        | n/a                                      | 14      |
| S61.9    | Open wound of wrist, unspecified                                                  | 2        | n/a                                      | 14      |
| S62.0    | Fracture of navicular [scaphoid] bone of wrist                                    | 2        | n/a                                      | 14      |
| S62.21   | Fracture of first metacarpal bone, base                                           | 2        | n/a                                      | 14      |
| S62.3    | Fracture of unspecified metacarpal bone                                           | 2        | n/a                                      | 14      |
| S62.30   | Fracture of unspecified metacarpal bone, unspecified                              | 2        | n/a                                      | 14      |
| S62.60   | Fracture of other finger, unspecified                                             | 2        | n/a                                      | 14      |
| S62.61   | Fracture of proximal phalanx of other finger                                      | 2        | n/a                                      | 14      |
| S62.62   | Fracture of middle phalanx of other finger                                        | 2        | n/a                                      | 14      |
| S62.63   | Fracture of distal phalanx of other finger                                        | 2        | n/a                                      | 14      |
| S63.52   | Sprain of radiocarpal joint of wrist                                              | 2        | n/a                                      | 14      |
| S63.6    | Sprain of unspecified finger                                                      | 2        | n/a                                      | 14      |
| S63.60   | Sprain of unspecified finger, unspecified                                         | 2        | n/a                                      | 14      |
| S63.68   | Sprain of unspecified finger, other                                               | 2        | n/a                                      | 14      |
| S66.2    | Laceration of extensor muscle, fascia and tendon of thumb at wrist and hand level | 2        | n/a                                      | 14      |
| S68.1    | Complete or partial traumatic amputation of other finger                          | 2        | n/a                                      | 14      |
| S70.0    | Contusion of hip                                                                  | 2        | n/a                                      | 14      |
| S70.1    | Contusion of thigh                                                                | 2        | n/a                                      | 14      |

| ICD-Code | Description                                                                                      | category | approximate duration of infection (days) | cluster |
|----------|--------------------------------------------------------------------------------------------------|----------|------------------------------------------|---------|
| S71.0    | Open wound of hip                                                                                | 2        | n/a                                      | 14      |
| S72.3    | Fracture of shaft of femur                                                                       | 2        | n/a                                      | 14      |
| S76.4    | Unspecified injury of other specified muscles, fascia and tendons at thigh level                 | 2        | n/a                                      | 14      |
| S80.0    | Contusion of knee                                                                                | 2        | n/a                                      | 14      |
| S80.1    | Contusion of lower leg, unspecified                                                              | 2        | n/a                                      | 14      |
| S80.81   | Abrasion of lower leg                                                                            | 2        | n/a                                      | 14      |
| S81.0    | Open wound of knee                                                                               | 2        | n/a                                      | 14      |
| S81.9    | Open wound of lower leg, unspecified                                                             | 2        | n/a                                      | 14      |
| S82.18   | Other fracture of upper end of tibia                                                             | 2        | n/a                                      | 14      |
| S82.2    | Fracture of shaft of tibia                                                                       | 2        | n/a                                      | 14      |
| S82.21   | Fracture of shaft of tibia with fracture of fibula                                               | 2        | n/a                                      | 14      |
| S82.28   | Other fracture of shaft of tibia                                                                 | 2        | n/a                                      | 14      |
| S82.3    | Fracture of lower end of tibia                                                                   | 2        | n/a                                      | 14      |
| S82.31   | Fracture of lower end of tibia with fracture of fibula                                           | 2        | n/a                                      | 14      |
| S82.38   | Other fracture of lower end of tibia                                                             | 2        | n/a                                      | 14      |
| S82.40   | Fracture of fibula, unspecified                                                                  | 2        | n/a                                      | 14      |
| S82.6    | Fracture of lateral malleolus of fibula                                                          | 2        | n/a                                      | 14      |
| S83.0    | Subluxation of patella                                                                           | 2        | n/a                                      | 14      |
| S83.10   | Subluxation of knee, unspecified                                                                 | 2        | n/a                                      | 14      |
| S83.50   | Sprain of unspecified cruciate ligament of knee                                                  | 2        | n/a                                      | 14      |
| S83.53   | Sprain of anterior cruciate ligament of knee                                                     | 2        | n/a                                      | 14      |
| S83.6    | Sprain of other specified parts of knee                                                          | 2        | n/a                                      | 14      |
| S86.1    | Unspecified injury of other muscle(s) and tendon(s) of posterior muscle group at lower leg level | 2        | n/a                                      | 14      |
| S90.0    | Contusion of ankle                                                                               | 2        | n/a                                      | 14      |
| S90.1    | Contusion of lesser toe(s) without damage to nail                                                | 2        | n/a                                      | 14      |
| S90.3    | Contusion of unspecified parts of foot                                                           | 2        | n/a                                      | 14      |
| S90.7    | Unspecified superficial injury of ankle and foot                                                 | 2        | n/a                                      | 14      |
| S90.81   | Abrasion of ankle and foot                                                                       | 2        | n/a                                      | 14      |
| S90.82   | Blister (nonthermal) of ankle and foot                                                           | 2        | n/a                                      | 14      |
| S90.83   | Insect bite (nonvenomous) of ankle and foot                                                      | 2        | n/a                                      | 14      |
| S90.84   | Superficial foreign body of ankle and foot                                                       | 2        | n/a                                      | 14      |
| S91.1    | Open wound of lesser toe(s) without damage to nail                                               | 2        | n/a                                      | 14      |
| S91.2    | Open wound of lesser toe(s) with damage to nail                                                  | 2        | n/a                                      | 14      |
| S91.3    | Open wound of unspecified parts of foot                                                          | 2        | n/a                                      | 14      |
| S92.2    | Fracture of tarsal bone(s) of foot                                                               | 2        | n/a                                      | 14      |
| S92.3    | Fracture of metatarsal bone(s) of foot                                                           | 2        | n/a                                      | 14      |
| S92.4    | Fracture of great toe                                                                            | 2        | n/a                                      | 14      |
| S92.5    | Fracture of lesser toe(s)                                                                        | 2        | n/a                                      | 14      |
| S93.2    | Rupture of ligaments at ankle and foot level                                                     | 2        | n/a                                      | 14      |
| S93.4    | Sprain of ankle                                                                                  | 2        | n/a                                      | 14      |
| S93.40   | Sprain of ankle, unspecified                                                                     | 2        | n/a                                      | 14      |

| ICD-Code | Description                                                                                                     | category | approximate duration of infection (days) | cluster |
|----------|-----------------------------------------------------------------------------------------------------------------|----------|------------------------------------------|---------|
| S93.43   | Sprain of tibiofibular ligament of ankle                                                                        | 2        | n/a                                      | 14      |
| S93.48   | Sprain of other ligament of ankle                                                                               | 2        | n/a                                      | 14      |
| S93.5    | Sprain of metatarsophalangeal joint of toe(s)                                                                   | 2        | n/a                                      | 14      |
| S93.6    | Sprain and strain of other and unspecified parts of foot                                                        | 2        | n/a                                      | 14      |
| S96.9    | Unspecified injury of unspecified muscles and tendons at ankle and foot level, right foot, subsequent encounter | 2        | n/a                                      | 14      |
| S99.9    | Unspecified injury of ankle                                                                                     | 2        | n/a                                      | 14      |
| T00.0    | Superficial injuries involving head with neck                                                                   | 2        | n/a                                      | 14      |
| T09.05   | Contusion of unspecified muscle and tendon of trunk                                                             | 2        | n/a                                      | 14      |
| T10.0    | Fracture of upper limb, level unspecified                                                                       | 2        | n/a                                      | 14      |
| T11.05   | Contusion of upper limb, level unspecified                                                                      | 2        | n/a                                      | 14      |
| T11.9    | Unspecified injury of upper limb, level unspecified                                                             | 2        | n/a                                      | 14      |
| T13.05   | Contusion of lower limb, level unspecified                                                                      | 2        | n/a                                      | 14      |
| T13.9    | Unspecified injury of lower limb, level unspecified                                                             | 2        | n/a                                      | 14      |
| T14.01   | Abrasion of unspecified body region                                                                             | 2        | n/a                                      | 14      |
| T14.03   | Insect bite (nonvenomous) of unspecified body region                                                            | 2        | n/a                                      | 14      |
| T14.05   | Contusion of unspecified body region                                                                            | 2        | n/a                                      | 14      |
| T14.1    | Open wound of unspecified body region                                                                           | 2        | n/a                                      | 14      |
| T14.6    | Injury of muscles and tendons of unspecified body region                                                        | 2        | n/a                                      | 14      |
| T14.9    | Injury, unspecified                                                                                             | 2        | n/a                                      | 14      |
| T15.8    | Foreign body in other and multiple parts of external eye                                                        | 2        | n/a                                      | 14      |
| T16      | Foreign body in ear                                                                                             | 2        | n/a                                      | 14      |
| T17.1    | Foreign body in nostril                                                                                         | 2        | n/a                                      | 14      |
| T17.2    | Foreign body in pharynx                                                                                         | 2        | n/a                                      | 14      |
| T17.4    | Foreign body in trachea                                                                                         | 2        | n/a                                      | 14      |
| T17.9    | Foreign body in respiratory tract, part unspecified                                                             | 2        | n/a                                      | 14      |
| T18.0    | Foreign body in mouth                                                                                           | 2        | n/a                                      | 14      |
| T18.1    | Foreign body in esophagus                                                                                       | 2        | n/a                                      | 14      |
| T18.2    | Foreign body in stomach                                                                                         | 2        | n/a                                      | 14      |
| T18.8    | Foreign body in other parts of alimentary tract                                                                 | 2        | n/a                                      | 14      |
| T18.9    | Foreign body of alimentary tract, part unspecified                                                              | 2        | n/a                                      | 14      |
| T20.0    | Burn of unspecified degree of head, face, and neck                                                              | 2        | n/a                                      | 14      |
| T20.20   | Burn of second degree of head, face, and neck                                                                   | 2        | n/a                                      | 14      |
| T21.00   | Burn of unspecified degree of trunk                                                                             | 2        | n/a                                      | 14      |
| T21.15   | Burn of first degree of genital region                                                                          | 2        | n/a                                      | 14      |
| T21.23   | Burn of second degree of abdominal wall                                                                         | 2        | n/a                                      | 14      |
| T22.10   | Burn of first degree of shoulder and upper limb, except wrist and hand                                          | 2        | n/a                                      | 14      |
| T22.2    | Burn of second degree of shoulder and upper limb, except wrist and hand                                         | 2        | n/a                                      | 14      |
| T22.21   | Burn of second degree of forearm and elbow                                                                      | 2        | n/a                                      | 14      |
| T22.22   | Burn of second degree of upper arm and shoulder                                                                 | 2        | n/a                                      | 14      |
| T23.0    | Burn of unspecified degree of hand                                                                              | 2        | n/a                                      | 14      |
| T23.20   | Burn of second degree of hand                                                                                   | 2        | n/a                                      | 14      |

| ICD-Code | Description                                                                         | category | approximate duration of infection (days) | cluster |
|----------|-------------------------------------------------------------------------------------|----------|------------------------------------------|---------|
| T23.3    | Burn of third degree of hand                                                        | 2        | n/a                                      | 14      |
| T24.0    | Burn of unspecified degree of lower limb, except ankle and foot                     | 2        | n/a                                      | 14      |
| T24.20   | Burn of second degree of lower limb, except ankle and foot                          | 2        | n/a                                      | 14      |
| T24.21   | Burn of second degree of lower limb, except ankle and foot                          | 2        | n/a                                      | 14      |
| T25.0    | Burn of unspecified degree of ankle and foot                                        | 2        | n/a                                      | 14      |
| T25.20   | Burn of second degree of ankle and foot                                             | 2        | n/a                                      | 14      |
| T29.20   | Burns of multiple regions, no more than second-degree burns mentioned               | 2        | n/a                                      | 14      |
| T30.0    | Burn of unspecified body region, unspecified degree                                 | 2        | n/a                                      | 14      |
| T30.1    | Burn of first degree, body region unspecified                                       | 2        | n/a                                      | 14      |
| T30.20   | Burn of second degree, body region unspecified                                      | 2        | n/a                                      | 14      |
| T39.1    | Poisoning by 4-Aminophenol derivatives                                              | 2        | n/a                                      | 14      |
| T46.5    | Poisoning by other antihypertensive drugs                                           | 2        | n/a                                      | 14      |
| T50.8    | Poisoning by diagnostic agents                                                      | 2        | n/a                                      | 14      |
| T50.9    | Other and unspecified drugs, medicaments and biological substances                  | 2        | n/a                                      | 14      |
| T51.9    | Toxic effect of unspecified alcohol                                                 | 2        | n/a                                      | 14      |
| T55      | Toxic effect of soaps                                                               | 2        | n/a                                      | 14      |
| T60.9    | Toxic effect of unspecified pesticide                                               | 2        | n/a                                      | 14      |
| T62.1    | Toxic effect of ingested berries                                                    | 2        | n/a                                      | 14      |
| T62.9    | Toxic effect of unspecified noxious substance eaten as food                         | 2        | n/a                                      | 14      |
| T63.4    | Toxic effect of venom of centipedes and venomous millipedes                         | 2        | n/a                                      | 14      |
| T63.8    | Toxic effect of contact with other venomous animals                                 | 2        | n/a                                      | 14      |
| T65.9    | Toxic effect of unspecified substance                                               | 2        | n/a                                      | 14      |
| T67.0    | Heatstroke and sunstroke                                                            | 2        | n/a                                      | 14      |
| T70.8    | Other effects of air pressure and water pressure                                    | 2        | n/a                                      | 14      |
| T74.9    | Unspecified adult maltreatment                                                      | 2        | n/a                                      | 14      |
| T75.1    | Unspecified effects of drowning and nonfatal submersion                             | 2        | n/a                                      | 14      |
| T75.4    | Electrocution                                                                       | 2        | n/a                                      | 14      |
| T78.0    | Anaphylactic reaction due to unspecified food                                       | 2        | n/a                                      | 14      |
| T78.1    | Other adverse food reactions, not elsewhere classified                              | 2        | n/a                                      | 14      |
| T78.4    | Allergy, unspecified                                                                | 2        | n/a                                      | 14      |
| T79.3    | Post-traumatic wound infection, not elsewhere classified                            | 1        | 14                                       | 8       |
| T79.9    | Unspecified early complication of trauma                                            | 2        | n/a                                      | 14      |
| T81.0    | Haemorrhage and haematoma complicating a procedure, not elsewhere classified        | 2        | n/a                                      | 14      |
| T81.9    | Unspecified complication of procedure                                               | 2        | n/a                                      | 14      |
| T85.5    | Mechanical complication of gastrointestinal prosthetic devices, implants and grafts | 2        | n/a                                      | 14      |
| T88.1    | Other complications following immunization, not elsewhere classified                | 2        | n/a                                      | 14      |
| Z01.5    | Diagnostic skin and sensitization tests                                             | 2        | n/a                                      | 14      |
| Z03.3    | Observation for suspected nervous system disorder                                   | 2        | n/a                                      | 14      |
| Z03.6    | Observation for suspected toxic effect from ingested substance                      | 2        | n/a                                      | 14      |
| Z03.8    | Observation for other suspected diseases and conditions                             | 2        | n/a                                      | 14      |
| Z03.9    | Observation for suspected disease or condition, unspecified                         | 2        | n/a                                      | 14      |

| ICD-Code | Description                                                                                             | category | approximate duration of infection (days) | cluster |
|----------|---------------------------------------------------------------------------------------------------------|----------|------------------------------------------|---------|
| Z20.8    | Contact with and exposure to other communicable diseases                                                | 2        | n/a                                      | 14      |
| Z47.0    | Follow-up care involving removal of fracture plate and other internal fixation device                   | 2        | n/a                                      | 14      |
| Z71      | Persons encountering health services for other counselling and medical advice, not elsewhere classified | 2        | n/a                                      | 14      |
| Z76.9    | Person encountering health services in unspecified circumstances                                        | 2        | n/a                                      | 14      |
| Z91.0    | Personal history of allergy, other than to drugs and biological substances                              | 2        | n/a                                      | 14      |

Documented ICD10-Codes with description and assigned categories (infectious = 1, non-infectious = 2), which defined control groups and categorization of repeated visits.

Approximate duration of infection and clusters of body regions were used to define related visits due to an infection.

n/a: not applicable because ICD is non-infectious

n/a\*: not applicable because unlikely to present again with the same disease

clusters: 1 = gastrointestinal, 2 = herpes, 3 = eye, 4 = ear, 5 = pharynx/larynx, 6 = lung, 7 = mouth, 8 = skin, 9 = joints/bones, 10 = urinary tract/kidney/genitalia, 11 = unspecified viridae, 12 = other, unrelated, 13 = measles, 14 = non-infectious



**eTable 2. Changes in matching controls to cases**

| ID    | sex    | days difference from<br>case date of<br>presentation | case duration of<br>stay | control duration of<br>stay |
|-------|--------|------------------------------------------------------|--------------------------|-----------------------------|
| 005.2 | -      | 34                                                   | -                        | -                           |
| 006.1 | male   | 46                                                   | -                        | -                           |
| 007.1 | male   | 42                                                   | -                        | -                           |
| 007.4 | male   | 32                                                   | -                        | -                           |
| 009.1 | -      | 39                                                   | 4                        | 2                           |
| 009.2 | -      | -                                                    | 4                        | 2                           |
| 009.4 | male   | 45                                                   | -                        | -                           |
| 010.1 | -      | 46                                                   | -                        | -                           |
| 014.1 | male   | 36                                                   | -                        | -                           |
| 014.3 | -      | 43                                                   | -                        | -                           |
| 026.2 | male   | -                                                    | -                        | -                           |
| 030.2 | -      | 31                                                   | -                        | -                           |
| 031.1 | female | -                                                    | -                        | -                           |
| 040.1 | male   | -                                                    | -                        | -                           |
| 040.2 | male   | -                                                    | -                        | -                           |
| 040.3 | male   | -                                                    | -                        | -                           |
| 040.4 | male   | -                                                    | -                        | -                           |
| 049.1 | male   | 41                                                   | 11                       | 4                           |
| 049.2 | male   | -                                                    | 11                       | 2                           |
| 049.3 | -      | 31                                                   | -                        | -                           |
| 049.4 | male   | -                                                    | 11                       | 6                           |
| 051.2 | -      | 38                                                   | -                        | -                           |
| 051.3 | -      | 47                                                   | -                        | -                           |
| 051.4 | female | 33                                                   | -                        | -                           |
| 053.1 | female | -                                                    | -                        | -                           |
| 053.2 | female | -                                                    | -                        | -                           |
| 053.3 | female | -                                                    | -                        | -                           |
| 053.4 | female | -                                                    | -                        | -                           |
| 062.2 | female | -                                                    | -                        | -                           |
| 067.1 | -      | 40                                                   | -                        | -                           |
| 067.2 | -      | 46                                                   | -                        | -                           |
| 067.3 | female | 44                                                   | -                        | -                           |
| 071.2 | male   | -                                                    | -                        | -                           |
| 076.2 | female | 38                                                   | -                        | -                           |
| 076.3 | -      | 33                                                   | -                        | -                           |
| 087.2 | female | 31                                                   | -                        | -                           |
| 089.2 | male   | -                                                    | -                        | -                           |
| 097.1 | -      | 36                                                   | -                        | -                           |
| 097.4 | -      | 41                                                   | -                        | -                           |
| 098.2 | -      | 41                                                   | -                        | -                           |
| 099.1 | male   | -                                                    | -                        | -                           |
| 099.3 | -      | 36                                                   | -                        | -                           |

| <b>ID</b> | <b>sex</b> | <b>days difference from<br/>case date of<br/>presentation</b> | <b>case duration of<br/>stay</b> | <b>control duration of<br/>stay</b> |
|-----------|------------|---------------------------------------------------------------|----------------------------------|-------------------------------------|
| 100.1     | -          | 37                                                            | -                                | -                                   |
| 100.2     | female     | -                                                             | -                                | -                                   |
| 100.3     | -          | 38                                                            | -                                | -                                   |
| 101.2     | female     | -                                                             | -                                | -                                   |
| 101.3     | -          | 35                                                            | -                                | -                                   |
| 101.4     | female     | -                                                             | -                                | -                                   |
| 102.2     | -          | 62                                                            | -                                | -                                   |
| 102.3     | -          | 36                                                            | -                                | -                                   |
| 103.1     | male       | -                                                             | -                                | -                                   |
| 103.2     | male       | -                                                             | -                                | -                                   |
| 104.1     | -          | 32                                                            | -                                | -                                   |
| 106.3     | male       | -                                                             | -                                | -                                   |
| 106.4     | male       | -                                                             | -                                | -                                   |
| 107.3     | -          | 38                                                            | -                                | -                                   |
| 107.4     | -          | 44                                                            | -                                | -                                   |
| 109.1     | -          | 35                                                            | -                                | -                                   |
| 109.2     | -          | 33                                                            | -                                | -                                   |
| 110.3     | male       | -                                                             | -                                | -                                   |
| 110.4     | male       | -                                                             | -                                | -                                   |
| 112.2     | -          | 46                                                            | -                                | -                                   |
| 112.4     | -          | 41                                                            | -                                | -                                   |
| 113.1     | male       | -                                                             | -                                | -                                   |
| 113.2     | male       | -                                                             | -                                | -                                   |
| 113.3     | -          | 40                                                            | -                                | -                                   |
| 113.4     | -          | 48                                                            | -                                | -                                   |
| 115.1     | -          | 43                                                            | -                                | -                                   |
| 115.2     | female     | 43                                                            | -                                | -                                   |
| 115.4     | -          | 31                                                            | -                                | -                                   |
| 116.1     | male       | 39                                                            | -                                | -                                   |
| 117.1     | male       | 38                                                            | -                                | -                                   |
| 117.2     | -          | 48                                                            | -                                | -                                   |
| 118.1     | male       | -                                                             | -                                | -                                   |
| 118.2     | male       | -                                                             | -                                | -                                   |
| 121.1     | female     | -                                                             | -                                | -                                   |
| 121.2     | female     | 41                                                            | -                                | -                                   |
| 122.1     | male       | 35                                                            | -                                | -                                   |
| 122.2     | male       | -                                                             | 9                                | 4                                   |
| 127.1     | -          | -                                                             | 7                                | 2                                   |
| 127.2     | -          | 33                                                            | 7                                | 2                                   |
| 127.3     | male       | -                                                             | -                                | -                                   |
| 127.4     | male       | -                                                             | -                                | -                                   |
| 128.2     | -          | 34                                                            | -                                | -                                   |
| 132.1     | male       | -                                                             | -                                | -                                   |
| 132.2     | male       | 46                                                            | -                                | -                                   |

| <b>ID</b> | <b>sex</b> | <b>days difference from<br/>case date of<br/>presentation</b> | <b>case duration of<br/>stay</b> | <b>control duration of<br/>stay</b> |
|-----------|------------|---------------------------------------------------------------|----------------------------------|-------------------------------------|
| 132.4     | -          | 32                                                            | -                                | -                                   |
| 133.2     | -          | 33                                                            | -                                | -                                   |
| 134.1     | -          | 45                                                            | -                                | -                                   |
| 134.2     | -          | -                                                             | 8                                | 3                                   |
| 134.4     | -          | 48                                                            | -                                | -                                   |
| 135.1     | -          | 37                                                            | -                                | -                                   |
| 135.3     | male       | -                                                             | -                                | -                                   |
| 136.1     | male       | -                                                             | -                                | -                                   |
| 136.2     | male       | -                                                             | 7                                | 3                                   |
| 136.4     | male       | 40                                                            | -                                | -                                   |
| 138.4     | -          | -                                                             | -                                | -                                   |
| 143.3     | -          | 31                                                            | -                                | -                                   |
| 149.1     | -          | 31                                                            | -                                | -                                   |
| 172.2     | female     | -                                                             | -                                | -                                   |
| 173.3     | male       | -                                                             | -                                | -                                   |
| 173.4     | male       | -                                                             | -                                | -                                   |
| 176.1     | female     | 38                                                            | -                                | -                                   |
| 176.2     | -          | -                                                             | 3                                | 1                                   |
| 176.4     | female     | 40                                                            | -                                | -                                   |
| 180.1     | female     | 41                                                            | -                                | -                                   |
| 180.2     | female     | -                                                             | -                                | -                                   |
| 180.3     | female     | 31                                                            | -                                | -                                   |
| 186.2     | -          | 32                                                            | -                                | -                                   |
| 187.3     | -          | 32                                                            | -                                | -                                   |
| 187.4     | male       | -                                                             | -                                | -                                   |
| 189.2     | male       | -                                                             | -                                | -                                   |
| 189.3     | -          | 39                                                            | -                                | -                                   |
| 190.1     | -          | 38                                                            | -                                | -                                   |
| 191.1     | -          | 41                                                            | 4                                | 2                                   |
| 191.2     | -          | -                                                             | 4                                | 2                                   |
| 191.3     | -          | 37                                                            | -                                | -                                   |
| 191.4     | -          | 33                                                            | -                                | -                                   |
| 193.1     | female     | -                                                             | -                                | -                                   |
| 193.2     | female     | -                                                             | -                                | -                                   |
| 193.3     | -          | 45                                                            | -                                | -                                   |
| 193.4     | female     | -                                                             | -                                | -                                   |
| 198.2     | -          | 43                                                            | -                                | -                                   |
| 198.3     | male       | -                                                             | -                                | -                                   |
| 198.4     | male       | 38                                                            | -                                | -                                   |
| 199.1     | female     | -                                                             | -                                | -                                   |
| 199.2     | female     | -                                                             | -                                | -                                   |
| 200.1     | male       | 32                                                            | -                                | -                                   |
| 201.4     | female     | -                                                             | -                                | -                                   |
| 202.2     | -          | 42                                                            | -                                | -                                   |

| <b>ID</b> | <b>sex</b> | <b>days difference from<br/>case date of<br/>presentation</b> | <b>case duration of<br/>stay</b> | <b>control duration of<br/>stay</b> |
|-----------|------------|---------------------------------------------------------------|----------------------------------|-------------------------------------|
| 204.3     | female     | -                                                             | -                                | -                                   |
| 212.1     | -          | 31                                                            | -                                | -                                   |
| 213.3     | female     | -                                                             | -                                | -                                   |
| 215.2     | -          | 34                                                            | -                                | -                                   |
| 218.2     | -          | 31                                                            | -                                | -                                   |
| 219.2     | -          | 36                                                            | -                                | -                                   |
| 225.1     | -          | 37                                                            | -                                | -                                   |
| 225.2     | -          | 33                                                            | -                                | -                                   |
| 225.4     | -          | 38                                                            | -                                | -                                   |
| 226.2     | -          | 40                                                            | 4                                | 1                                   |
| 226.4     | -          | 51                                                            | -                                | -                                   |
| 228.3     | -          | 32                                                            | -                                | -                                   |
| 228.4     | -          | 31                                                            | -                                | -                                   |
| 233.4     | -          | 46                                                            | -                                | -                                   |
| 234.1     | male       | 50                                                            | -                                | -                                   |
| 234.2     | male       | -                                                             | -                                | -                                   |
| 234.3     | male       | 34                                                            | -                                | -                                   |
| 234.4     | male       | -                                                             | -                                | -                                   |
| 236.1     | -          | 31                                                            | -                                | -                                   |
| 238.1     | male       | -                                                             | -                                | -                                   |
| 238.2     | male       | -                                                             | -                                | -                                   |
| 238.3     | male       | -                                                             | -                                | -                                   |
| 238.4     | male       | -                                                             | 17                               | 11                                  |
| 242.2     | male       | -                                                             | -                                | -                                   |
| 243.1     | male       | -                                                             | -                                | -                                   |
| 243.2     | male       | -                                                             | -                                | -                                   |
| 244.3     | female     | -                                                             | -                                | -                                   |
| 244.4     | female     | -                                                             | -                                | -                                   |
| 245.2     | -          | 36                                                            | -                                | -                                   |
| 245.3     | -          | 57                                                            | -                                | -                                   |
| 246.1     | -          | -                                                             | 5                                | 2                                   |
| 246.2     | -          | -                                                             | 5                                | 2                                   |
| 246.3     | male       | -                                                             | -                                | -                                   |
| 248.1     | -          | -                                                             | 9                                | 2                                   |
| 248.2     | -          | 35                                                            | 9                                | 2                                   |
| 248.3     | -          | 46                                                            | -                                | -                                   |
| 248.4     | -          | 41                                                            | -                                | -                                   |
| 249.1     | male       | -                                                             | -                                | -                                   |
| 249.2     | male       | -                                                             | -                                | -                                   |
| 249.3     | male       | -                                                             | -                                | -                                   |
| 249.4     | -          | 42                                                            | -                                | -                                   |
| 250.1     | -          | 41                                                            | -                                | -                                   |
| 250.2     | -          | 35                                                            | -                                | -                                   |

| ID    | sex    | days difference from<br>case date of<br>presentation | case duration of<br>stay | control duration of<br>stay |
|-------|--------|------------------------------------------------------|--------------------------|-----------------------------|
| 251.2 | -      | 42                                                   | -                        | -                           |
| 251.4 | -      | 38                                                   | -                        | -                           |
| 253.1 | male   | -                                                    | -                        | -                           |
| 253.2 | male   | -                                                    | -                        | -                           |
| 253.3 | -      | 31                                                   | -                        | -                           |
| 253.4 | male   | 33                                                   | -                        | -                           |
| 254.1 | female | -                                                    | -                        | -                           |
| 254.2 | female | -                                                    | -                        | -                           |
| 254.3 | female | -                                                    | -                        | -                           |
| 254.4 | female | 39                                                   | -                        | -                           |
| 255.4 | female | -                                                    | -                        | -                           |
| 262.1 | male   | -                                                    | -                        | -                           |
| 262.2 | male   | -                                                    | -                        | -                           |
| 262.3 | male   | -                                                    | -                        | -                           |
| 262.4 | male   | -                                                    | -                        | -                           |
| 263.1 | female | -                                                    | -                        | -                           |
| 263.2 | female | -                                                    | -                        | -                           |
| 263.3 | female | -                                                    | -                        | -                           |
| 263.4 | female | -                                                    | -                        | -                           |
| 266.1 | female | 41                                                   | 5                        | 1                           |
| 266.2 | -      | 36                                                   | -                        | -                           |
| 267.1 | -      | -                                                    | 4                        | 2                           |
| 267.2 | -      | -                                                    | 4                        | 1                           |
| 267.3 | -      | -                                                    | 4                        | 6                           |
| 267.4 | male   | 37                                                   | 4                        | 2                           |
| 268.1 | female | 34                                                   | -                        | -                           |
| 268.2 | -      | 39                                                   | -                        | -                           |
| 270.1 | -      | 48                                                   | -                        | -                           |
| 270.2 | -      | 43                                                   | 5                        | 2                           |
| 270.3 | female | -                                                    | -                        | -                           |
| 270.4 | -      | 42                                                   | -                        | -                           |
| 271.1 | male   | 39                                                   | -                        | -                           |
| 271.2 | -      | 45                                                   | -                        | -                           |
| 271.4 | male   | 32                                                   | -                        | -                           |

Necessary changes in matching to identify four controls for cases. The search was expanded to any sex, controls sex is listed, date of presentation maximum  $\pm$  2 months, listed as difference in days to case date of presentation, and any length of stay, listed with case and control length of stay.

**eTable 3. repeat visits due to infectious diseases**

| measles cases (n patients = 90, n repeat visits due to infectious diseases = 212) |                                                       |    |                    |               | infectious disease controls (n patients = 216, n repeat visits due to infectious diseases = 464) |                                                       |    |                    |               | non-infectious disease controls (n patients = 168, n repeat visits due to infectious diseases = 311) |                                                     |    |                    |               |
|-----------------------------------------------------------------------------------|-------------------------------------------------------|----|--------------------|---------------|--------------------------------------------------------------------------------------------------|-------------------------------------------------------|----|--------------------|---------------|------------------------------------------------------------------------------------------------------|-----------------------------------------------------|----|--------------------|---------------|
| ICD-Code                                                                          | Description                                           | N  | % of repeat visits | Commulative % | ICD-Code                                                                                         | Description                                           | N  | % of repeat visits | Commulative % | ICD-Code                                                                                             | Description                                         | N  | % of repeat visits | Commulative % |
| J06.9                                                                             | Acute upper respiratory infection, unspecified        | 22 | 10%                | 10%           | J06.9                                                                                            | Acute upper respiratory infection, unspecified        | 76 | 16%                | 16%           | J06.9                                                                                                | Acute upper respiratory infection, unspecified      | 51 | 16%                | 16%           |
| A09.9                                                                             | Other gastroenteritis and colitis, unspecified        | 18 | 8%                 | 19%           | B34.9                                                                                            | Viral infection, unspecified                          | 50 | 11%                | 27%           | B34.9                                                                                                | Viral infection, unspecified                        | 30 | 10%                | 26%           |
| A09.0                                                                             | Infectious gastroenteritis and colitis, unspecified   | 16 | 8%                 | 26%           | J20.9                                                                                            | Acute bronchitis, unspecified                         | 40 | 9%                 | 36%           | A09.9                                                                                                | Other gastroenteritis and colitis, unspecified      | 26 | 8%                 | 34%           |
| B34.9                                                                             | Viral infection, unspecified                          | 13 | 6%                 | 33%           | A09.9                                                                                            | Other gastroenteritis and colitis, unspecified        | 36 | 8%                 | 44%           | H66.9                                                                                                | Otitis media, unspecified                           | 15 | 5%                 | 39%           |
| J20.9                                                                             | Acute bronchitis, unspecified                         | 13 | 6%                 | 39%           | H66.9                                                                                            | Otitis media, unspecified                             | 23 | 5%                 | 48%           | J02.9                                                                                                | Acute pharyngitis, unspecified                      | 12 | 4%                 | 43%           |
| H66.9                                                                             | Otitis media, unspecified                             | 9  | 4%                 | 43%           | J03.9                                                                                            | Acute tonsillitis, unspecified                        | 23 | 5%                 | 53%           | J38.5                                                                                                | Laryngeal spasm                                     | 12 | 4%                 | 46%           |
| J03.0                                                                             | Acute streptococcal tonsillitis, unspecified          | 9  | 4%                 | 47%           | J38.5                                                                                            | Laryngeal spasm                                       | 19 | 4%                 | 58%           | J00                                                                                                  | Acute nasopharyngitis [common cold]                 | 12 | 4%                 | 50%           |
| J02.9                                                                             | Acute pharyngitis, unspecified                        | 6  | 3%                 | 50%           | A09.0                                                                                            | Infectious gastroenteritis and colitis, unspecified   | 19 | 4%                 | 62%           | J03.9                                                                                                | Acute tonsillitis, unspecified                      | 10 | 3%                 | 54%           |
| J03.9                                                                             | Acute tonsillitis, unspecified                        | 6  | 3%                 | 53%           | B08.4                                                                                            | Enteroviral vesicular stomatitis with exanthem        | 11 | 2%                 | 64%           | J20.9                                                                                                | Acute bronchitis, unspecified                       | 9  | 3%                 | 56%           |
| J38.5                                                                             | Laryngeal spasm                                       | 6  | 3%                 | 56%           | J02.9                                                                                            | Acute pharyngitis, unspecified                        | 9  | 2%                 | 66%           | J03.0                                                                                                | Acute streptococcal tonsillitis, unspecified        | 8  | 3%                 | 59%           |
| J40                                                                               | Bronchitis, not specified as acute or chronic         | 5  | 2%                 | 58%           | J03.0                                                                                            | Acute streptococcal tonsillitis, unspecified          | 6  | 1%                 | 67%           | A09.0                                                                                                | Infectious gastroenteritis and colitis, unspecified | 6  | 2%                 | 61%           |
| A08.4                                                                             | Viral intestinal infection, unspecified               | 4  | 2%                 | 60%           | H10.0                                                                                            | Mucopurulent conjunctivitis                           | 6  | 1%                 | 69%           | B08.4                                                                                                | Enteroviral vesicular stomatitis with exanthem      | 6  | 2%                 | 63%           |
| B00.2                                                                             | Herpesviral gingivostomatitis and pharyngotonsillitis | 4  | 2%                 | 62%           | J18.0                                                                                            | Bronchopneumonia, unspecified organism                | 6  | 1%                 | 70%           | H10.9                                                                                                | Unspecified conjunctivitis                          | 6  | 2%                 | 65%           |
| J00                                                                               | Acute nasopharyngitis [common cold]                   | 4  | 2%                 | 64%           | B00.2                                                                                            | Herpesviral gingivostomatitis and pharyngotonsillitis | 6  | 1%                 | 71%           | H65.0                                                                                                | Acute serous otitis media                           | 6  | 2%                 | 67%           |
| L03.01                                                                            | Cellulitis and acute lymphangitis of finger           | 4  | 2%                 | 66%           | J40                                                                                              | Bronchitis, not specified as acute or chronic         | 5  | 1%                 | 72%           | J40                                                                                                  | Bronchitis, not specified as acute or chronic       | 5  | 2%                 | 68%           |
| N48.1                                                                             | Balanitis                                             | 4  | 2%                 | 67%           | J18.9                                                                                            | Pneumonia, unspecified organism                       | 5  | 1%                 | 73%           | H66.0                                                                                                | Acute suppurative otitis media                      | 5  | 2%                 | 70%           |
| R50.9                                                                             | Fever, unspecified                                    | 4  | 2%                 | 69%           | J00                                                                                              | Acute nasopharyngitis [common cold]                   | 4  | 1%                 | 74%           | N39.0                                                                                                | Urinary tract infection, site not specified         | 5  | 2%                 | 71%           |

| measles cases (n patients = 90, n repeat visits due to infectious diseases = 212) |                                                               |   |                    |               | infectious disease controls (n patients = 216, n repeat visits due to infectious diseases = 464) |                                                                               |   |                    |               | non-infectious disease controls (n patients = 168, n repeat visits due to infectious diseases = 311) |                                                                               |   |                    |               |
|-----------------------------------------------------------------------------------|---------------------------------------------------------------|---|--------------------|---------------|--------------------------------------------------------------------------------------------------|-------------------------------------------------------------------------------|---|--------------------|---------------|------------------------------------------------------------------------------------------------------|-------------------------------------------------------------------------------|---|--------------------|---------------|
| ICD-Code                                                                          | Description                                                   | N | % of repeat visits | Commulative % | ICD-Code                                                                                         | Description                                                                   | N | % of repeat visits | Commulative % | ICD-Code                                                                                             | Description                                                                   | N | % of repeat visits | Commulative % |
| J18.0                                                                             | Bronchopneumonia, unspecified organism                        | 3 | 1%                 | 71%           | N39.0                                                                                            | Urinary tract infection, site not specified                                   | 4 | 1%                 | 75%           | J06.8                                                                                                | Acute upper respiratory infections of multiple and unspecified sites          | 5 | 2%                 | 73%           |
| A08.0                                                                             | Rotaviral enteritis                                           | 2 | 1%                 | 72%           | J06.8                                                                                            | Acute upper respiratory infections of multiple and unspecified sites          | 4 | 1%                 | 76%           | B09                                                                                                  | Unspecified viral infection characterized by skin and mucous membrane lesions | 4 | 1%                 | 74%           |
| B08.4                                                                             | Enteroviral vesicular stomatitis with exanthem                | 2 | 1%                 | 73%           | B09                                                                                              | Unspecified viral infection characterized by skin and mucous membrane lesions | 4 | 1%                 | 77%           | H10.3                                                                                                | Unspecified acute conjunctivitis                                              | 4 | 1%                 | 75%           |
| B99                                                                               | Other and unspecified infectious disease                      | 2 | 1%                 | 74%           | J03.8                                                                                            | Acute tonsillitis due to other specified organisms                            | 4 | 1%                 | 78%           | K12.1                                                                                                | Other forms of stomatitis                                                     | 3 | 1%                 | 76%           |
| H10.9                                                                             | Unspecified conjunctivitis                                    | 2 | 1%                 | 75%           | L03.01                                                                                           | Cellulitis and acute lymphangitis of finger                                   | 4 | 1%                 | 78%           | H10.0                                                                                                | Mucopurulent conjunctivitis                                                   | 3 | 1%                 | 77%           |
| H65.0                                                                             | Acute serous otitis media                                     | 2 | 1%                 | 75%           | B99                                                                                              | Other and unspecified infectious disease                                      | 4 | 1%                 | 79%           | N48.1                                                                                                | Balanitis                                                                     | 2 | 1%                 | 78%           |
| J04.0                                                                             | Acute laryngitis                                              | 2 | 1%                 | 76%           | H10.9                                                                                            | Unspecified conjunctivitis                                                    | 3 | 1%                 | 80%           | J18.0                                                                                                | Bronchopneumonia, unspecified organism                                        | 2 | 1%                 | 79%           |
| J44.89                                                                            | Chronic obstructive pulmonary disease, unspecified            | 2 | 1%                 | 77%           | H65.0                                                                                            | Acute serous otitis media                                                     | 3 | 1%                 | 81%           | J44.89                                                                                               | Chronic obstructive pulmonary disease, unspecified                            | 2 | 1%                 | 79%           |
| K12.1                                                                             | Other forms of stomatitis                                     | 2 | 1%                 | 78%           | K12.1                                                                                            | Other forms of stomatitis                                                     | 3 | 1%                 | 81%           | B08.5                                                                                                | Enteroviral vesicular pharyngitis                                             | 2 | 1%                 | 80%           |
| K35.32                                                                            | Acute appendicitis with abscess                               | 2 | 1%                 | 79%           | N48.1                                                                                            | Balanitis                                                                     | 3 | 1%                 | 82%           | B80                                                                                                  | Enterobiasis                                                                  | 2 | 1%                 | 81%           |
| L03.11                                                                            | Cellulitis of lower limb                                      | 2 | 1%                 | 80%           | J44.89                                                                                           | Chronic obstructive pulmonary disease, unspecified                            | 3 | 1%                 | 83%           | J02.8                                                                                                | Acute pharyngitis due to other specified organisms                            | 2 | 1%                 | 81%           |
| L05.0                                                                             | Pilonidal cyst with abscess                                   | 2 | 1%                 | 81%           | A38                                                                                              | Scarlet fever                                                                 | 3 | 1%                 | 83%           | J03.8                                                                                                | Acute tonsillitis due to other specified organisms                            | 2 | 1%                 | 82%           |
| L22                                                                               | Diaper dermatitis                                             | 2 | 1%                 | 82%           | R50.9                                                                                            | Fever, unspecified                                                            | 3 | 1%                 | 84%           | J18.9                                                                                                | Pneumonia, unspecified organism                                               | 2 | 1%                 | 82%           |
| A08.1                                                                             | Acute gastroenteropathy due to Norwalk agent                  | 1 | 0%                 | 83%           | H65.1                                                                                            | Other acute nonsuppurative otitis media                                       | 3 | 1%                 | 84%           | A38                                                                                                  | Scarlet fever                                                                 | 2 | 1%                 | 83%           |
| A08.3                                                                             | Other viral enteritis                                         | 1 | 0%                 | 83%           | J20.5                                                                                            | Acute bronchitis due to respiratory syncytial virus                           | 3 | 1%                 | 85%           | H65.9                                                                                                | Unspecified nonsuppurative otitis media                                       | 2 | 1%                 | 84%           |
| A60.0                                                                             | Herpesviral infection of genital organs and urogenital system | 1 | 0%                 | 83%           | J20                                                                                              | Acute bronchitis                                                              | 3 | 1%                 | 86%           | J06.0                                                                                                | Acute laryngopharyngitis                                                      | 2 | 1%                 | 84%           |

| measles cases (n patients = 90, n repeat visits due to infectious diseases = 212) |                                                                               |   |                    |               | infectious disease controls (n patients = 216, n repeat visits due to infectious diseases = 464) |                                                                                     |   |                    |               | non-infectious disease controls (n patients = 168, n repeat visits due to infectious diseases = 311) |                                                                  |   |                    |               |
|-----------------------------------------------------------------------------------|-------------------------------------------------------------------------------|---|--------------------|---------------|--------------------------------------------------------------------------------------------------|-------------------------------------------------------------------------------------|---|--------------------|---------------|------------------------------------------------------------------------------------------------------|------------------------------------------------------------------|---|--------------------|---------------|
| ICD-Code                                                                          | Description                                                                   | N | % of repeat visits | Commulative % | ICD-Code                                                                                         | Description                                                                         | N | % of repeat visits | Commulative % | ICD-Code                                                                                             | Description                                                      | N | % of repeat visits | Commulative % |
| A88.8                                                                             | Other specified viral infections of central nervous system                    | 1 | 0%                 | 84%           | B08.5                                                                                            | Enteroviral vesicular pharyngitis                                                   | 2 | 0%                 | 86%           | N76.0                                                                                                | Acute vaginitis                                                  | 2 | 1%                 | 85%           |
| B02.2                                                                             | Other postherpetic nervous system involvement                                 | 1 | 0%                 | 84%           | J02.8                                                                                            | Acute pharyngitis due to other specified organisms                                  | 2 | 0%                 | 87%           | A08.4                                                                                                | Viral intestinal infection, unspecified                          | 1 | 0%                 | 85%           |
| B08.2                                                                             | Exanthema subitum [sixth disease], unspecified                                | 1 | 0%                 | 85%           | L08.9                                                                                            | Local infection of the skin and subcutaneous tissue, unspecified                    | 2 | 0%                 | 87%           | B00.2                                                                                                | Herpesviral gingivostomatitis and pharyngotonsillitis            | 1 | 0%                 | 86%           |
| B08.5                                                                             | Enteroviral vesicular pharyngitis                                             | 1 | 0%                 | 85%           | H10.2                                                                                            | other acute conjungtivitis                                                          | 2 | 0%                 | 88%           | L03.01                                                                                               | Cellulitis and acute lymphangitis of finger                      | 1 | 0%                 | 86%           |
| B09                                                                               | Unspecified viral infection characterized by skin and mucous membrane lesions | 1 | 0%                 | 86%           | J02.0                                                                                            | Streptococcal pharyngitis                                                           | 2 | 0%                 | 88%           | R50.9                                                                                                | Fever, unspecified                                               | 1 | 0%                 | 86%           |
| B34.0                                                                             | Adenovirus infection, unspecified                                             | 1 | 0%                 | 86%           | J12.1                                                                                            | Respiratory syncytial virus pneumonia                                               | 2 | 0%                 | 88%           | B99                                                                                                  | Other and unspecified infectious disease                         | 1 | 0%                 | 87%           |
| B37                                                                               | Candidal stomatitis                                                           | 1 | 0%                 | 87%           | L04.0                                                                                            | Acute lymphadenitis of face, head and neck                                          | 2 | 0%                 | 89%           | L03.11                                                                                               | Cellulitis of lower limb                                         | 1 | 0%                 | 87%           |
| B37.2                                                                             | Candidiasis of skin and nail                                                  | 1 | 0%                 | 87%           | A08.0                                                                                            | Rotaviral enteritis                                                                 | 2 | 0%                 | 89%           | L05.0                                                                                                | Pilonidal cyst with abscess                                      | 1 | 0%                 | 87%           |
| B80                                                                               | Enterobiasis                                                                  | 1 | 0%                 | 88%           | B86                                                                                              | Scabies                                                                             | 2 | 0%                 | 90%           | B08.2                                                                                                | Exanthema subitum [sixth disease], unspecified                   | 1 | 0%                 | 88%           |
| B86                                                                               | Scabies                                                                       | 1 | 0%                 | 88%           | J11.1                                                                                            | Influenza due to unidentified influenza virus with other respiratory manifestations | 2 | 0%                 | 90%           | B37.2                                                                                                | Candidiasis of skin and nail                                     | 1 | 0%                 | 88%           |
| H00.0                                                                             | Hordeolum                                                                     | 1 | 0%                 | 89%           | K12.0                                                                                            | Recurrent oral aphthae                                                              | 2 | 0%                 | 91%           | H00.0                                                                                                | Hordeolum                                                        | 1 | 0%                 | 88%           |
| H10.0                                                                             | Mucopurulent conjunctivitis                                                   | 1 | 0%                 | 89%           | B08.3                                                                                            | Erythema infectiosum [fifth disease]                                                | 2 | 0%                 | 91%           | H10.8                                                                                                | Other conjunctivitis                                             | 1 | 0%                 | 89%           |
| H10.8                                                                             | Other conjunctivitis                                                          | 1 | 0%                 | 90%           | J04.2                                                                                            | Acute laryngotracheitis                                                             | 2 | 0%                 | 91%           | H67.1                                                                                                | Otitis media in diseases classified elsewhere                    | 1 | 0%                 | 89%           |
| H60.1                                                                             | Cellulitis of external ear                                                    | 1 | 0%                 | 90%           | J22                                                                                              | Unspecified acute lower respiratory infection                                       | 2 | 0%                 | 92%           | J20.8                                                                                                | Acute bronchitis due to other specified organisms                | 1 | 0%                 | 89%           |
| H60.9                                                                             | Unspecified otitis externa                                                    | 1 | 0%                 | 91%           | K05.0                                                                                            | Acute gingivitis                                                                    | 2 | 0%                 | 92%           | L08.9                                                                                                | Local infection of the skin and subcutaneous tissue, unspecified | 1 | 0%                 | 89%           |
| H66.0                                                                             | Acute suppurative otitis media                                                | 1 | 0%                 | 91%           | K29.7                                                                                            | Gastritis, unspecified                                                              | 2 | 0%                 | 93%           | A08.2                                                                                                | Adenoviral enteritis                                             | 1 | 0%                 | 90%           |
| H67.1                                                                             | Otitis media in diseases classified elsewhere                                 | 1 | 0%                 | 92%           | A08.4                                                                                            | Viral intestinal infection, unspecified                                             | 1 | 0%                 | 93%           | B00.9                                                                                                | Herpesviral infection, unspecified                               | 1 | 0%                 | 90%           |



| measles cases (n patients = 90, n repeat visits due to infectious diseases = 212) |                                                                                     |   |                    |               | infectious disease controls (n patients = 216, n repeat visits due to infectious diseases = 464) |                                                                                    |   |                    |               | non-infectious disease controls (n patients = 168, n repeat visits due to infectious diseases = 311) |                                                     |   |                    |               |
|-----------------------------------------------------------------------------------|-------------------------------------------------------------------------------------|---|--------------------|---------------|--------------------------------------------------------------------------------------------------|------------------------------------------------------------------------------------|---|--------------------|---------------|------------------------------------------------------------------------------------------------------|-----------------------------------------------------|---|--------------------|---------------|
| ICD-Code                                                                          | Description                                                                         | N | % of repeat visits | Commulative % | ICD-Code                                                                                         | Description                                                                        | N | % of repeat visits | Commulative % | ICD-Code                                                                                             | Description                                         | N | % of repeat visits | Commulative % |
| J02.8                                                                             | Acute pharyngitis due to other specified organisms                                  | 1 | 0%                 | 92%           | B08.2                                                                                            | Exanthema subitum [sixth disease], unspecified                                     | 1 | 0%                 | 93%           | B01                                                                                                  | Varicella                                           | 1 | 0%                 | 90%           |
| J03.8                                                                             | Acute tonsillitis due to other specified organisms                                  | 1 | 0%                 | 92%           | J20.8                                                                                            | Acute bronchitis due to other specified organisms                                  | 1 | 0%                 | 93%           | B27.0                                                                                                | Gammaherpesviral mononucleosis without complication | 1 | 0%                 | 91%           |
| J11.1                                                                             | Influenza due to unidentified influenza virus with other respiratory manifestations | 1 | 0%                 | 93%           | A08.2                                                                                            | Adenoviral enteritis                                                               | 1 | 0%                 | 94%           | B34.1                                                                                                | Enterovirus infection, unspecified                  | 1 | 0%                 | 91%           |
| J13                                                                               | Pneumonia due to Streptococcus pneumoniae                                           | 1 | 0%                 | 93%           | J05.0                                                                                            | Acute obstructive laryngitis [croup]                                               | 1 | 0%                 | 94%           | B38                                                                                                  | Coccidioidomycosis                                  | 1 | 0%                 | 91%           |
| J18.1                                                                             | Lobar pneumonia, unspecified organism                                               | 1 | 0%                 | 94%           | K29.1                                                                                            | Other acute gastritis                                                              | 1 | 0%                 | 94%           | B85.0                                                                                                | Pediculus humanus capitis                           | 1 | 0%                 | 92%           |
| J18.9                                                                             | Pneumonia, unspecified organism                                                     | 1 | 0%                 | 94%           | K35.2                                                                                            | Acute appendicitis with generalized peritonitis                                    | 1 | 0%                 | 94%           | H10                                                                                                  | Conjunctivitis                                      | 1 | 0%                 | 92%           |
| J20.5                                                                             | Acute bronchitis due to respiratory syncytial virus                                 | 1 | 0%                 | 95%           | L02.4                                                                                            | Cutaneous abscess, furuncle and carbuncle of limb                                  | 1 | 0%                 | 94%           | H10.2                                                                                                | Other acute conjunctivitis                          | 1 | 0%                 | 92%           |
| J20.8                                                                             | Acute bronchitis due to other specified organisms                                   | 1 | 0%                 | 95%           | L03.02                                                                                           | Cellulitis and acute lymphangitis of toe                                           | 1 | 0%                 | 95%           | H65.1                                                                                                | Other acute nonsuppurative otitis media             | 1 | 0%                 | 93%           |
| J35.0                                                                             | Chronic tonsillitis                                                                 | 1 | 0%                 | 96%           | N51.2                                                                                            | Balanitis in diseases classified elsewhere                                         | 1 | 0%                 | 95%           | J02                                                                                                  | Acute pharyngitis                                   | 1 | 0%                 | 93%           |
| J41.1                                                                             | Mucopurulent chronic bronchitis                                                     | 1 | 0%                 | 96%           | R56.0                                                                                            | Febrile convulsions                                                                | 1 | 0%                 | 95%           | J02.0                                                                                                | Streptococcal pharyngitis                           | 1 | 0%                 | 93%           |
| K02.9                                                                             | Dental caries, unspecified                                                          | 1 | 0%                 | 97%           | J04.0                                                                                            | Acute laryngitis                                                                   | 1 | 0%                 | 95%           | J05.0                                                                                                | Acute obstructive laryngitis [croup]                | 1 | 0%                 | 94%           |
| K12.0                                                                             | Recurrent oral aphthae                                                              | 1 | 0%                 | 97%           | L22                                                                                              | Diaper dermatitis                                                                  | 1 | 0%                 | 95%           | J12.1                                                                                                | Respiratory syncytial virus pneumonia               | 1 | 0%                 | 94%           |
| K20                                                                               | Esophagitis                                                                         | 1 | 0%                 | 98%           | A46                                                                                              | Erysipelas                                                                         | 1 | 0%                 | 96%           | J15.7                                                                                                | Pneumonia due to Mycoplasma pneumoniae              | 1 | 0%                 | 94%           |
| L01.0                                                                             | Impetigo, unspecified                                                               | 1 | 0%                 | 98%           | A54.9                                                                                            | Gonococcal infection, unspecified                                                  | 1 | 0%                 | 96%           | J18.8                                                                                                | Other pneumonia, unspecified organism               | 1 | 0%                 | 95%           |
| L08.9                                                                             | Local infection of the skin and subcutaneous tissue, unspecified                    | 1 | 0%                 | 99%           | B08.8                                                                                            | Other specified viral infections characterized by skin and mucous membrane lesions | 1 | 0%                 | 96%           | K04.7                                                                                                | Periapical abscess without sinus                    | 1 | 0%                 | 95%           |
| N39.0                                                                             | Urinary tract infection, site not specified                                         | 1 | 0%                 | 99%           | G00.1                                                                                            | Pneumococcal meningitis                                                            | 1 | 0%                 | 96%           | K29.1                                                                                                | Other acute gastritis                               | 1 | 0%                 | 95%           |
| N76.2                                                                             | Acute vulvitis                                                                      | 1 | 0%                 | 100%          | H05.0                                                                                            | Acute inflammation of orbit                                                        | 1 | 0%                 | 97%           | K35.2                                                                                                | Acute appendicitis with generalized peritonitis     | 1 | 0%                 | 96%           |

| measles cases (n patients = 90, n repeat visits due to infectious diseases = 212) |                                                  |   |                    |               | infectious disease controls (n patients = 216, n repeat visits due to infectious diseases = 464) |                                                              |   |                    |               | non-infectious disease controls (n patients = 168, n repeat visits due to infectious diseases = 311) |                                                          |   |                    |               |
|-----------------------------------------------------------------------------------|--------------------------------------------------|---|--------------------|---------------|--------------------------------------------------------------------------------------------------|--------------------------------------------------------------|---|--------------------|---------------|------------------------------------------------------------------------------------------------------|----------------------------------------------------------|---|--------------------|---------------|
| ICD-Code                                                                          | Description                                      | N | % of repeat visits | Commulative % | ICD-Code                                                                                         | Description                                                  | N | % of repeat visits | Commulative % | ICD-Code                                                                                             | Description                                              | N | % of repeat visits | Commulative % |
| N76.88                                                                            | Other specified inflammation of vagina and vulva | 1 | 0%                 | 100%          | H16.0                                                                                            | Corneal ulcer                                                | 1 | 0%                 | 97%           | K36                                                                                                  | Other appendicitis                                       | 1 | 0%                 | 96%           |
|                                                                                   |                                                  |   |                    |               | H65                                                                                              | Acute nonsuppurative otitis media                            | 1 | 0%                 | 97%           | L02.2                                                                                                | Cutaneous abscess, furuncle and carbuncle of trunk       | 1 | 0%                 | 96%           |
|                                                                                   |                                                  |   |                    |               | H65.4                                                                                            | Other chronic nonsuppurative otitis media                    | 1 | 0%                 | 97%           | L02.4                                                                                                | Cutaneous abscess, furuncle and carbuncle of limb        | 1 | 0%                 | 96%           |
|                                                                                   |                                                  |   |                    |               | H70.0                                                                                            | Acute mastoiditis                                            | 1 | 0%                 | 97%           | L02.8                                                                                                | Cutaneous abscess, furuncle and carbuncle of other sites | 1 | 0%                 | 97%           |
|                                                                                   |                                                  |   |                    |               | J03                                                                                              | Acute tonsillitis                                            | 1 | 0%                 | 98%           | L03.02                                                                                               | Cellulitis and acute lymphangitis of toe                 | 1 | 0%                 | 97%           |
|                                                                                   |                                                  |   |                    |               | J15.9                                                                                            | Unspecified bacterial pneumonia                              | 1 | 0%                 | 98%           | L03.2                                                                                                | Cellulitis of face                                       | 1 | 0%                 | 97%           |
|                                                                                   |                                                  |   |                    |               | J21.0                                                                                            | Acute bronchiolitis due to respiratory syncytial virus       | 1 | 0%                 | 98%           | L04.0                                                                                                | Acute lymphadenitis of face, head and neck               | 1 | 0%                 | 98%           |
|                                                                                   |                                                  |   |                    |               | K35                                                                                              | Acute appendicitis                                           | 1 | 0%                 | 98%           | N51.2                                                                                                | Balanitis in diseases classified elsewhere               | 1 | 0%                 | 98%           |
|                                                                                   |                                                  |   |                    |               | K35.8                                                                                            | Unspecified acute appendicitis                               | 1 | 0%                 | 98%           | N61                                                                                                  | Inflammatory disorders of breast                         | 1 | 0%                 | 98%           |
|                                                                                   |                                                  |   |                    |               | L03.10                                                                                           | Cellulitis of upper limb                                     | 1 | 0%                 | 99%           | R50.80                                                                                               | Fever of unknown origin                                  | 1 | 0%                 | 99%           |
|                                                                                   |                                                  |   |                    |               | N30.0                                                                                            | Acute cystitis                                               | 1 | 0%                 | 99%           | R56.0                                                                                                | Febrile convulsions                                      | 1 | 0%                 | 99%           |
|                                                                                   |                                                  |   |                    |               | N30.9                                                                                            | Cystitis, unspecified                                        | 1 | 0%                 | 99%           |                                                                                                      |                                                          |   |                    |               |
|                                                                                   |                                                  |   |                    |               | N45.9                                                                                            | Orchitis, epididymitis and epididymoorchitis without abscess | 1 | 0%                 | 99%           |                                                                                                      |                                                          |   |                    |               |
|                                                                                   |                                                  |   |                    |               | N70.0                                                                                            | Acute salpingitis and oophoritis                             | 1 | 0%                 | 100%          |                                                                                                      |                                                          |   |                    |               |
|                                                                                   |                                                  |   |                    |               | N70.9                                                                                            | Salpingitis and oophoritis, unspecified                      | 1 | 0%                 | 100%          |                                                                                                      |                                                          |   |                    |               |
|                                                                                   |                                                  |   |                    |               | O23.0                                                                                            | Infections of kidney in pregnancy                            | 1 | 0%                 | 100%          |                                                                                                      |                                                          |   |                    |               |

ICD-Codes of repeat visits due to infectious diseases in measles cases, infectious disease controls and non-infectious disease controls, sorted by quantity in each group.

**eFigure 1. Distribution of studied measles cases over Berlin**

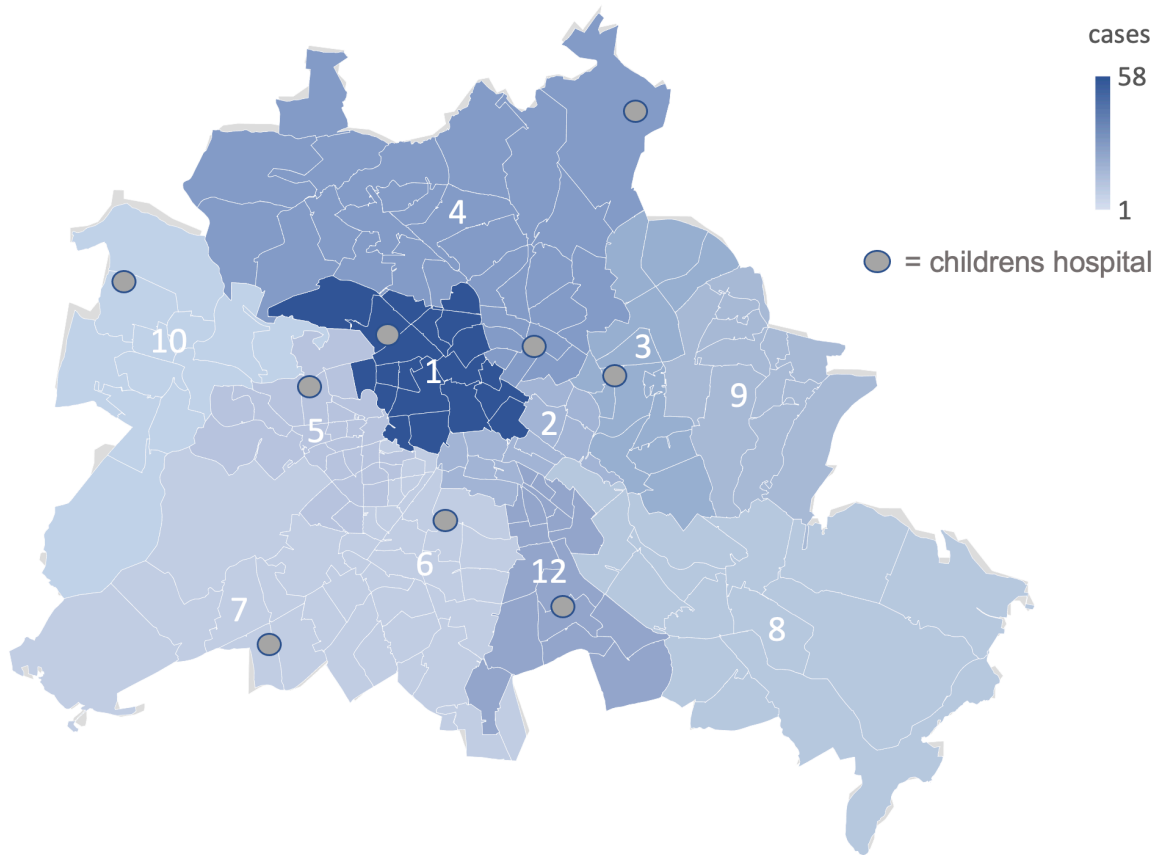

| Nr. on map | district                   | Nr. of cases |
|------------|----------------------------|--------------|
| 1          | Mitte                      | 58           |
| 2          | Friedrichshain-Kreuzberg   | 19           |
| 3          | Lichtenberg                | 22           |
| 4          | Pankow                     | 29           |
| 5          | Charlottenburg-Wilmersdorf | 13           |
| 6          | Tempelhof-Schöneberg       | 9            |
| 7          | Steglitz-Zehlendorf        | 9            |
| 8          | Treptow-Köpenick           | 12           |
| 9          | Marzahn-Hellersdorf        | 17           |
| 10         | Spandau                    | 8            |
| 11         | Reinickendorf              | 28           |
| 12         | Neukölln                   | 25           |

**eFigure 2. Empirical cumulative distribution of age**

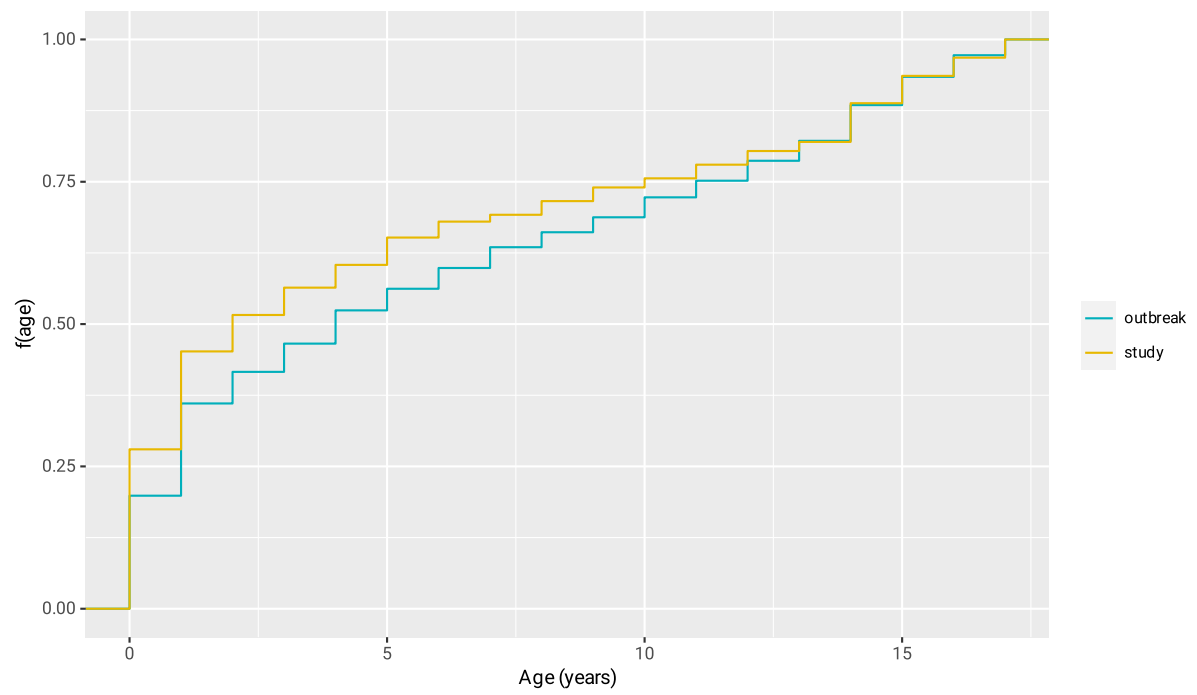

**eFigure 3. Registered inhabitants per district**

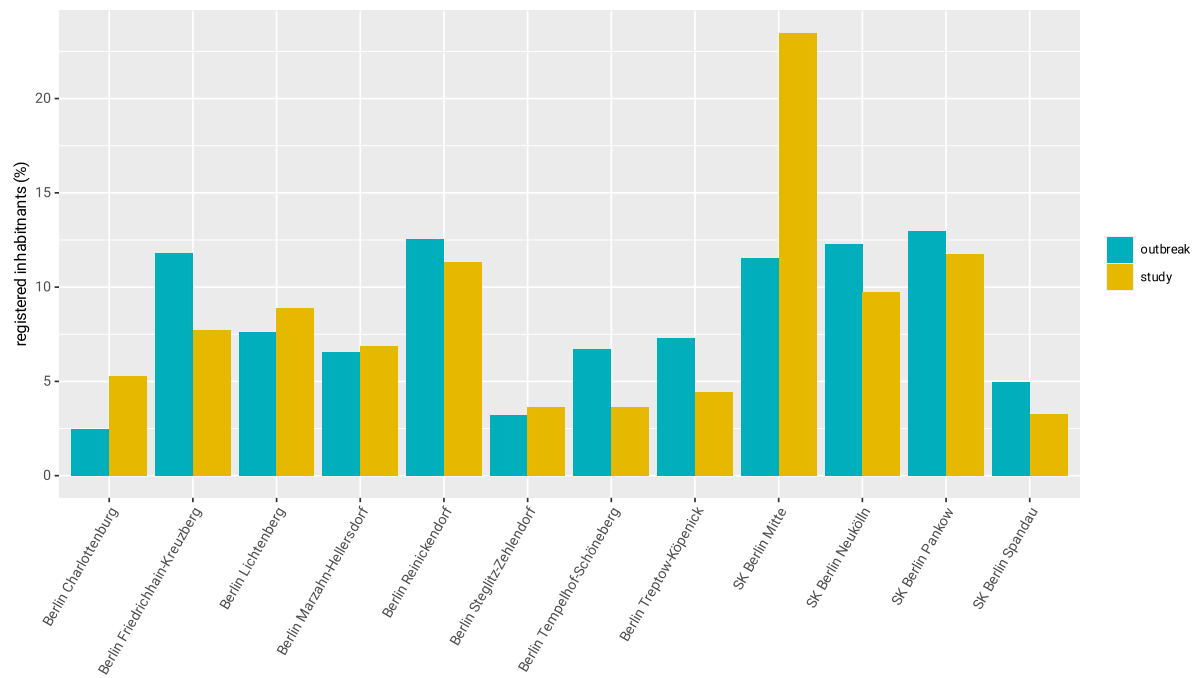

**eFigure 4. Number of infectious repeated visits per patient in percent per group**

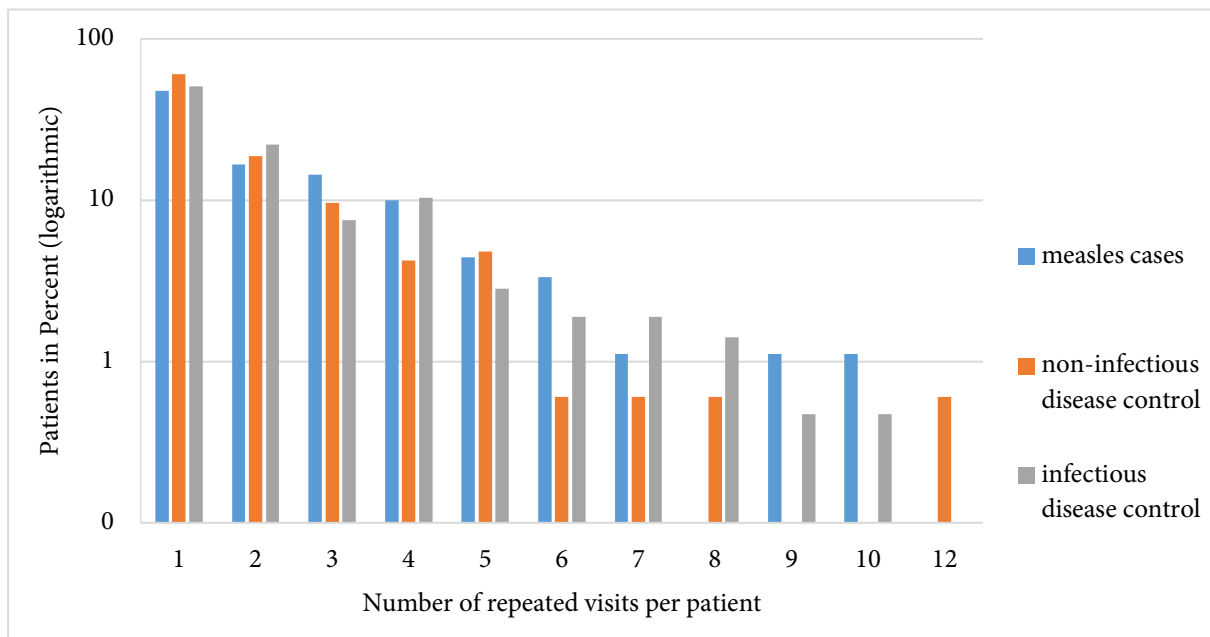

measles cases = blue, non-infectious control = orange, infectious control = gray
